# Supplementary material for: A robust heterodimeric bis-Rh(iii)–porphyrin macrocycle for the self-assembly of a kinetically stable [2]-rotaxane
Source: Royal Society of Chemistry journal article supplement (doi:10.1039/d3dt01186k), 2023-01-01
Supplement: d3dt01186k1.pdf [file d3dt01186k1.pdf]

## Supporting Information for

### **A Robust Heterodimeric Bis-Rh(III)-Porphyrin Macrocycle for the Self-Assembly of a Kinetically Stable [2]-Rotaxane**

Naoyuki Hisano<sup>a,†,\*</sup>, Virginia Valderrey<sup>a</sup>, Gemma Aragay and Pablo Ballester<sup>a,b\*</sup>

<sup>a</sup>*Institute of Chemical Research of Catalonia (ICIQ), The Barcelona Institute of Science and Technology (BIST),  
Avda. Països Catalans, 16, 43007 Tarragona, Spain.*

<sup>†</sup>*Current address: Naoyuki Hisano, Graduate School of Advanced Science and Engineering, Hiroshima University, 1-3-1 Kagamiyama, Higashi-Hiroshima, Hiroshima 739-8562, Japan.*

<sup>b</sup>*ICREA, Passeig Lluís Companys, 23, 08010 Barcelona, Spain.*

\*Correspondence to: Naoyuki Hisano chemhisano@hiroshima-u.ac.jp and Pablo Ballester pballester@iciq.es.

## Contents

|                                                                                         |     |
|-----------------------------------------------------------------------------------------|-----|
| 1. General information and instruments.....                                             | S3  |
| 2. Experimental Procedures .....                                                        | S4  |
| 3. Binding studies involving bisporphyrin 1-(RhI) <sub>2</sub> and bis-pyridine 2 ..... | S6  |
| 4. HRMS characterization.....                                                           | S13 |
| 5. <sup>1</sup> H NMR variable temperature studies .....                                | S18 |
| 6. Binding studies involving macrocycle 1-(RhI) <sub>2</sub> •2 and adipamide 3a.....   | S19 |
| 7. Binding studies involving macrocycle 1-(RhI) <sub>2</sub> •2 and adipamide 3b.....   | S22 |
| 8. NMR characterization.....                                                            | S26 |
| 9. References.....                                                                      | S32 |

## 1. General information and instruments

$^1\text{H}$  and  $^{13}\text{C}$  NMR spectra were recorded on a Bruker Avance 300, Bruker Avance 400, Bruker Avance 500, or Bruker Avance 500 with cryoprobe, and chemical shifts were reported on the delta scale in ppm relative to residual chloroform ( $\delta = 7.26$  and  $77.2$  for  $^1\text{H}$  and  $^{13}\text{C}$ , respectively), pyridine ( $\delta = 8.74$  and  $150.4$  for  $^1\text{H}$  and  $^{13}\text{C}$ , respectively), and 1,1,2,2-tetrachloroethane ( $\delta = 6.00$  and  $73.8$  for  $^1\text{H}$  and  $^{13}\text{C}$ , respectively). High Resolution Mass Spectra (HRMS) were obtained on a Bruker HPLC-ESI-TOF (MicroTOF Focus), Bruker HPLC-ESI-QqTOF (MaXis Impact) or Thermo Fisher Scientific Q Exactive Orbitrap equipped with a Heated Electrospray Ionization (HESI) source. Melting points (Mp) were measured with a MP70 Melting Point System. Preparative separations were performed by silica gel gravity column chromatography (silica gel  $60 \text{ \AA}$  and 230–400 mesh particle size). The size-exclusion chromatography was performed using Agilent PLgel  $3 \mu\text{m}$  GPC column. Dichloromethane was used as the eluting solvent. Commercially available reagents and solvents were used without purification except where noted.

## 2. Experimental Procedures

### *Synthesis of free-base bis-porphyrin 1-H<sub>2</sub>.*

To a solution of 4-(10,15,20-tris(4-pentylphenyl)porphyrin-5-yl)aniline (590 mg, 0.70 mmol) and 4-(benzyloxy)pyridine-2,6-dicarbonyl dichloride (99 mg, 0.32 mmol) in THF (16 mL) were added pyridine (0.1 mL) and 4-(dimethylamino)pyridine (280 mg, 2.29 mmol) under argon. After the mixture was stirred at room temperature for 16 h, the reaction mixture was poured into saturated NaHCO<sub>3</sub> solution, and the aqueous layer was extracted with CH<sub>2</sub>Cl<sub>2</sub>. The organic layer was washed with brine, dried over sodium sulfate, and concentrated under reduced pressure. The residue was purified by silica-gel column chromatography (50%-100% CH<sub>2</sub>Cl<sub>2</sub>/hexane) and biobeads to give a purple solid (543 mg, 89%). Mp: > 300 °C. <sup>1</sup>H NMR (chloroform-*d*, 400 MHz): δ 10.04 (s, 2H), 8.80-8.93 (m, 16H), 8.32 (d, 4H, *J* = 8.4 Hz), 8.29 (s, 2H), 8.25 (d, 4H, *J* = 8.4 Hz), 8.10 (d, 8H, *J* = 7.8 Hz), 7.54 (d, 4H, *J* = 8.4 Hz), 7.40-7.60 (m, 5H), 5.45 (s, 2H), 2.87-3.01 (m, 12H), 1.84-1.97 (m, 12H), 1.42-1.55 (m, 24H), 1.02 (t, 6H, *J* = 7.0 Hz), 1.00 (t, 12H, *J* = 7.0 Hz), -2.76 (s, 4H). <sup>13</sup>C {<sup>1</sup>H} NMR (chloroform-*d*, 125 MHz): δ 168.4, 161.6, 151.4, 142.5, 139.6, 139.6, 139.3, 137.0, 135.6, 135.0, 134.8, 134.7, 131.3, 129.1, 129.0, 127.9, 126.2, 120.6, 120.5, 119.1, 118.6, 112.6, 71.2, 36.1, 36.1, 32.0, 31.5, 31.5, 22.9, 22.9, 14.4, 14.3.

### *Synthesis of diiodo Rh(III) bis-porphyrin 1-(RhI)<sub>2</sub>.*

A solution of [Rh(CO)<sub>2</sub>Cl]<sub>2</sub> (44.6 mg, 0.115 mmol) in dry CH<sub>2</sub>Cl<sub>2</sub> (6 mL) was added dropwise under argon to a mixture of free-base bis-porphyrin 1-H<sub>2</sub> (105 mg, 0.0546 mmol) and anhydrous NaOAc (89.2 mg, 1.09 mmol) in dry CH<sub>2</sub>Cl<sub>2</sub> (15 mL). After the resulting reaction mixture was stirred for 3 hours at room temperature under argon in the dark, iodine (83.2 mg, 0.328 mmol) was added, and the mixture was stirred 8 hours at room temperature under argon. The reaction mixture was partially evaporated and passed through alumina (5% THF/CH<sub>2</sub>Cl<sub>2</sub>), and the organic solution was washed with aqueous KI, water, and then brine, dried over Na<sub>2</sub>SO<sub>4</sub>, and concentrated under reduced pressure. The desired product was obtained as a purple solid (127 mg, 98%). Mp: > 300 °C. <sup>1</sup>H NMR (pyridine-*d*<sub>5</sub>, 400 MHz): δ 11.89 (s, 2H), 9.26 (d, 4H, *J* = 5.0 Hz), 9.22 (s, 8H), 9.22 (d, 4H, *J* = 5.0 Hz), 8.80 (dd, 2H, *J* = 8.4, 2.4 Hz), 8.57 (s, 2H), 8.55 (dd, 2H, *J* = 8.4, 2.4 Hz), 8.38 (dd, 2H, *J* = 8.2, 2.1 Hz), 8.34 (dd, 2H, *J* = 8.2, 2.1 Hz), 8.24-8.32 (m, 12H), 7.69 (d, 2H, *J* = 7.4 Hz), 7.63 (d, 6H, *J* = 7.7 Hz), 7.59 (d, 6H, *J* = 7.7 Hz), 7.54 (t, 2H, *J* = 7.4 Hz), 7.45 (t, 1H, *J* = 7.4 Hz), 5.44 (s, 2H), 2.89 (t, 12H, *J* = 7.6 Hz), 1.78-1.87 (m, 12H), 1.38-1.49 (m, 24H), 0.97 (t, 6H, *J* = 7.2 Hz), 0.96 (t, 12H, *J* = 7.2 Hz). <sup>13</sup>C {<sup>1</sup>H} NMR (pyridine-*d*<sub>5</sub>, 125 MHz): δ 168.6, 163.4, 153.1, 150.8, 150.7, 149.9, 144.1, 144.1, 144.1, 144.0, 143.3, 140.2, 139.4, 138.9, 136.7, 136.5, 136.4, 136.2, 136.0, 135.7, 135.5, 135.4, 135.1, 133.7, 133.6, 133.5, 129.7, 129.4, 129.0, 127.9, 127.6, 124.4, 124.3, 123.6, 123.1, 123.1, 122.5, 120.6, 120.4, 113.2, 71.5, 36.6, 32.4, 32.0, 23.4, 14.8. HRMS (ESI<sup>+</sup>) *m/z*: [M+Na]<sup>+</sup> Calcd for C<sub>132</sub>H<sub>125</sub>I<sub>2</sub>O<sub>3</sub>N<sub>11</sub>Rh<sub>2</sub>Na 2394.6058. Found, 2394.6028.

### *Synthesis of bis-pyridyl ligand 2.*

To a solution of 3,5-dimethylpyridin-4-amine (360 mg, 2.95 mmol) and 4-(benzyloxy)pyridine-2,6-dicarbonyl dichloride (409 mg, 1.32 mmol) in dry CH<sub>2</sub>Cl<sub>2</sub> was added *N,N*-diisopropylethylamine (0.5 mL) under argon. After the mixture was stirred at room temperature 16 hours, the reaction mixture was extracted with CH<sub>2</sub>Cl<sub>2</sub>. The organic

layer was washed saturated NaHCO<sub>3</sub> solution and brine, dried over Na<sub>2</sub>SO<sub>4</sub>, and concentrated under reduced pressure. The solid residue was recrystallized in CH<sub>2</sub>Cl<sub>2</sub>/EtOAc to give a white solid (304 mg, 48%). Mp: 257-259 °C. <sup>1</sup>H NMR (chloroform-*d*, 400 MHz): δ 9.25 (s, 2H), 8.37 (s, 4H), 8.10 (s, 2H), 7.35-7.50 (m, 5H), 5.32 (s, 2H), 2.29 (s, 12H). <sup>13</sup>C {<sup>1</sup>H} NMR (chloroform-*d*, 125 MHz): δ 168.2, 161.3, 150.6, 149.6, 142.0, 134.9, 130.2, 129.1, 129.0, 127.9, 112.9, 71.2, 15.7. MS (ESI<sup>+</sup>) m/z: [M+H]<sup>+</sup> Calcd for C<sub>28</sub>H<sub>28</sub>O<sub>3</sub>N<sub>5</sub> 482.21. Found 482.2.

*Macrocyclic [I-(RhI)<sub>2</sub>•2]*: <sup>1</sup>H NMR (1,1,2,2-tetrachloroethane-*d*<sub>2</sub>, 400 MHz): δ 10.47 (s, 2H), 8.96 (d, 2H, *J* = 8.2 Hz), 8.95 (d, 4H, *J* = 5.3 Hz), 8.88-8.91 (m, 8H), 8.87 (d, 4H, *J* = 5.3 Hz), 8.58 (d, 2H, *J* = 5.3 Hz), 8.22 (s, 2H), 8.21 (d, 4H, *J* = 7.6 Hz), 8.13 (d, 2H, *J* = 7.6 Hz), 8.06 (d, 2H, *J* = 7.6 Hz), 8.04 (d, 4H, *J* = 7.6 Hz), 7.93 (d, 2H, *J* = 8.2 Hz), 7.45-7.65 (m, 17H), 7.36 (d, 2H, *J* = 8.2 Hz), 7.34 (s, 2H), 7.27 (s, 2H), 7.07-7.25 (m, 5H), 5.47 (s, 2H), 4.85 (s, 2H), 2.99 (t, 8H, *J* = 7.4 Hz), 2.92 (t, 8H, *J* = 7.4 Hz), 1.82-2.03 (m, 12H), 1.42-1.57 (m, 24H), 1.05 (t, 12H, *J* = 7.0 Hz), 1.01 (t, 6H, *J* = 7.0 Hz), 0.62 (s, 4H), 0.53 (s, 12H).

#### *Synthesis of dichloro Rh(III) bis-porphyrin I-(RhCl)<sub>2</sub>.*

A solution of [Rh(CO)<sub>2</sub>Cl]<sub>2</sub> (46.5 mg, 0.12 mmol) in toluene (15 mL) was added under argon to a solution of free-base bis-porphyrin **1-H<sub>2</sub>** (112 mg, 0.06 mmol) in toluene (10 mL). After the resulting reaction mixture was stirred for at 80 °C 14 hours under argon in the dark. The reaction mixture was evaporated and purified by preparative TLC (7% CH<sub>3</sub>CN/toluene). The desired product was obtained as a purple solid (100 mg, 80%). Mp: > 300 °C. <sup>1</sup>H NMR (pyridine-*d*<sub>5</sub>, 300 MHz): δ 11.40 (s, 2H), 9.18 (m, 16H), 8.54 (br m, 3H), 8.23 (br m, 16H), 7.55 (br m, 20H), 5.40 (s, 2H), 2.84 (m, 12H), 1.78 (m, 12H), 1.39 (m, 24H), 0.91 (m, 18H).

### 3. Binding studies involving bisporphyrin 1-(RhI)<sub>2</sub> and bis-pyridine 2

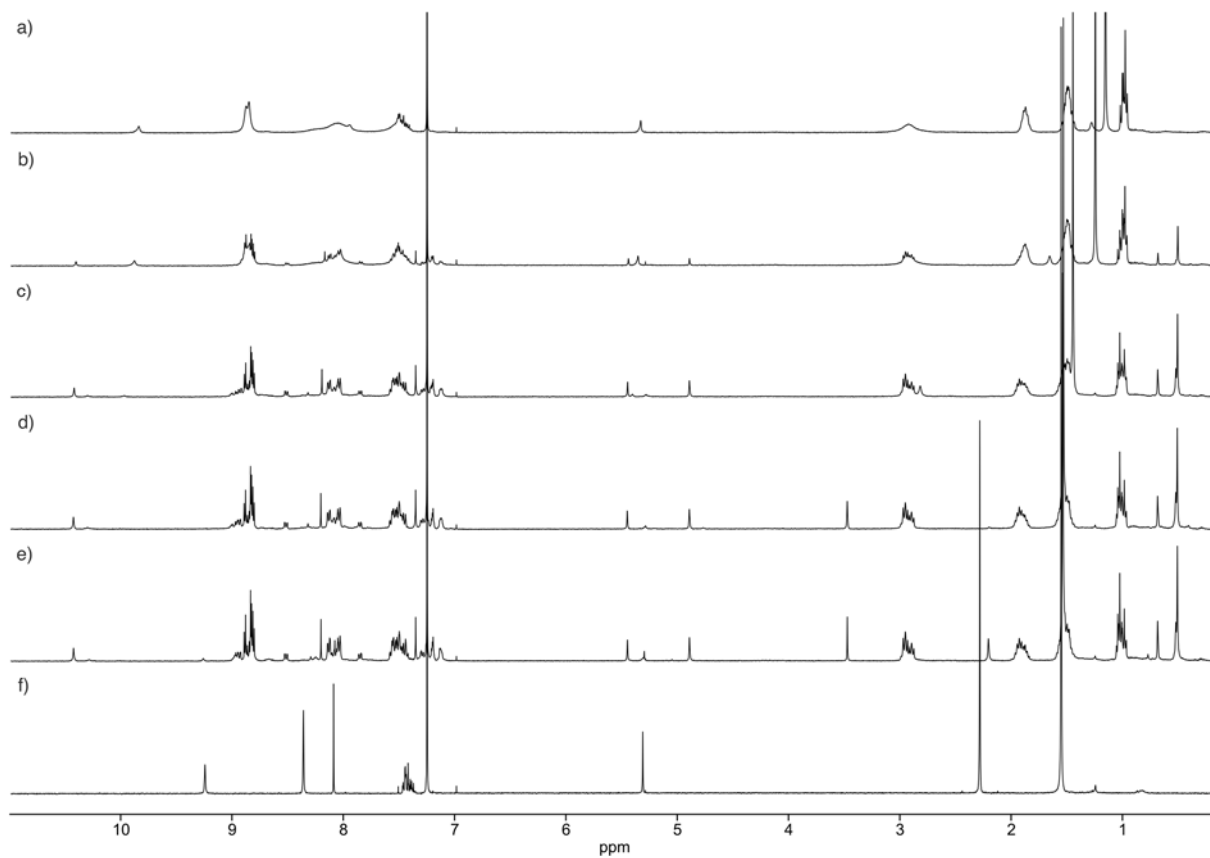

**Figure S1.** Change of <sup>1</sup>H NMR spectra of (a) **1-(RhI)<sub>2</sub>** ( $2.0 \times 10^{-3}$  mol L<sup>-1</sup>), (b) **1-(RhI)<sub>2</sub>** with 0.25 equiv. of **2**, (c) **1-(RhI)<sub>2</sub>** with 0.75 equiv. of **2**, (d) **1-(RhI)<sub>2</sub>** with 1.0 equiv. of **2**, (e) **1-(RhI)<sub>2</sub>** with 1.25 equiv. of **2**, and (f) **2** ( $2.0 \times 10^{-3}$  mol L<sup>-1</sup>) in chloroform-*d*.

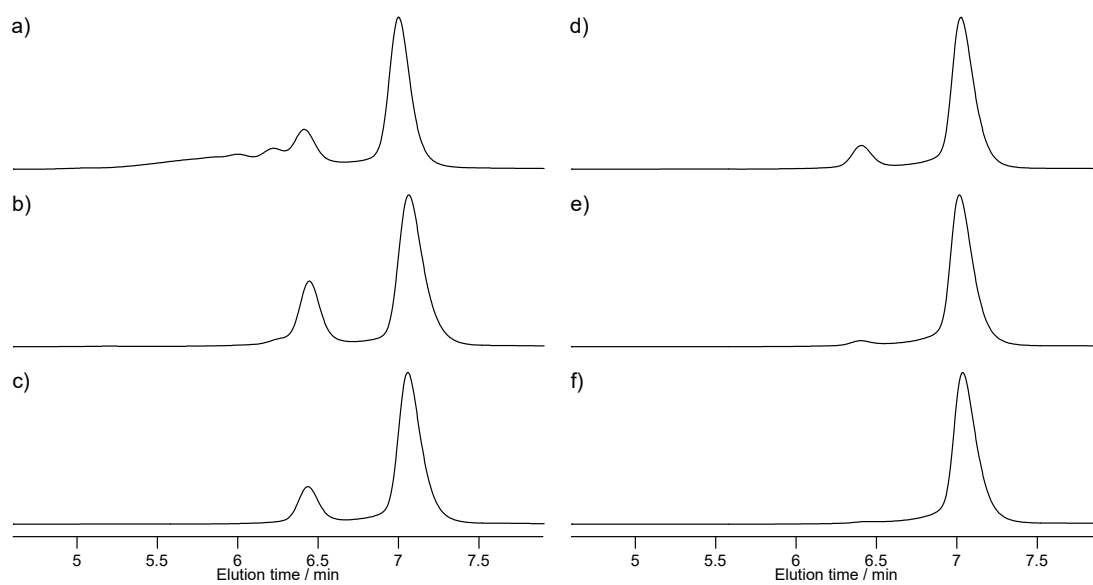

**Figure S2.** GPC chromatograms of a mixture of **1-(RhI)<sub>2</sub>** and **2** (a) at initial state and after standing at room temperature for (b) 1 h, (c) 10 h, (d) 1 day, (e) 3 days, and (f) 7 days in 1,1,2,2-tetrachloroethane-*d*<sub>2</sub>.

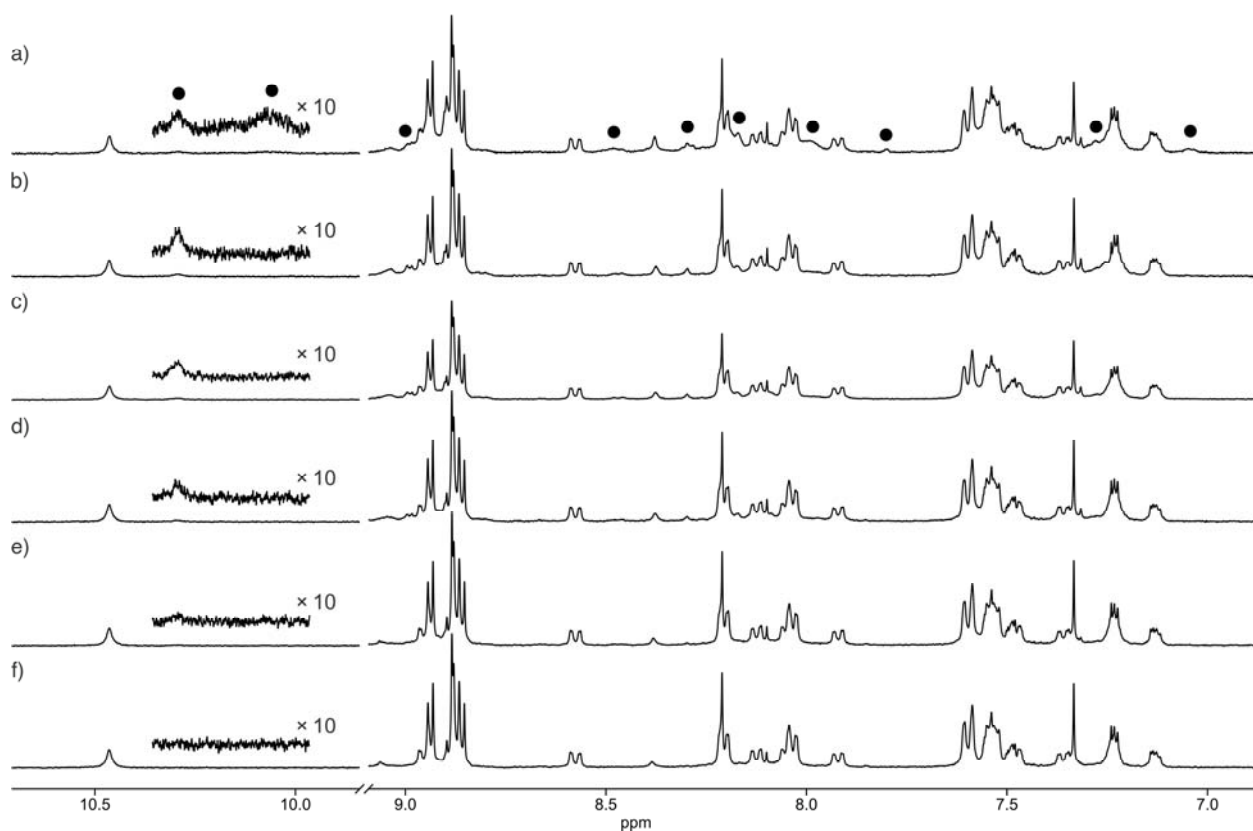

**Figure S3.** Selected region of the <sup>1</sup>H NMR spectra of a 1:1 mixture of **1-(RhI)<sub>2</sub>** and **2** (a) at initial state and after standing at room temperature for (b) 3 h, (c) 11 h, (d) 1 day, (e) 3 days, and (f) 7 days in 1,1,2,2-tetrachloroethane-*d*<sub>2</sub>. The filled circles denote unassigned oligomeric species.

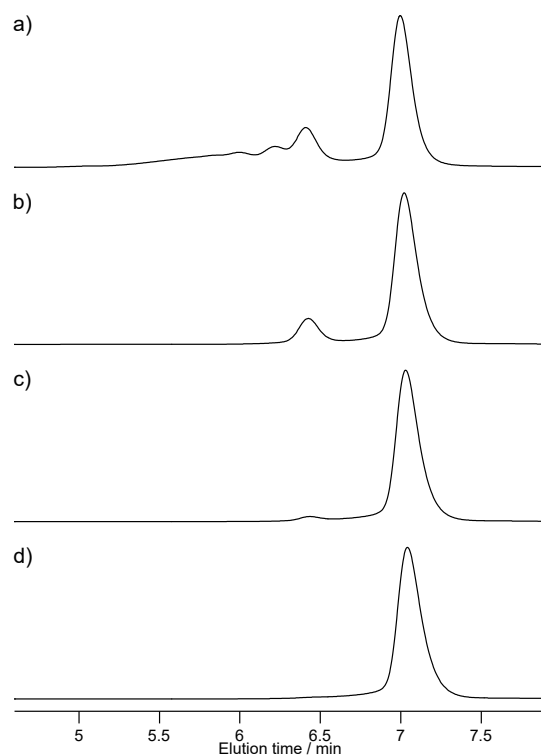

**Figure S4.** GPC chromatograms of a mixture of **1-(RhI)<sub>2</sub>** and **2** (a) at initial state and after heating at 80 °C for (b) 1 min, (c) 3 min, and (d) 6 min in 1,1,2,2-tetrachloroethane-*d*<sub>2</sub>.

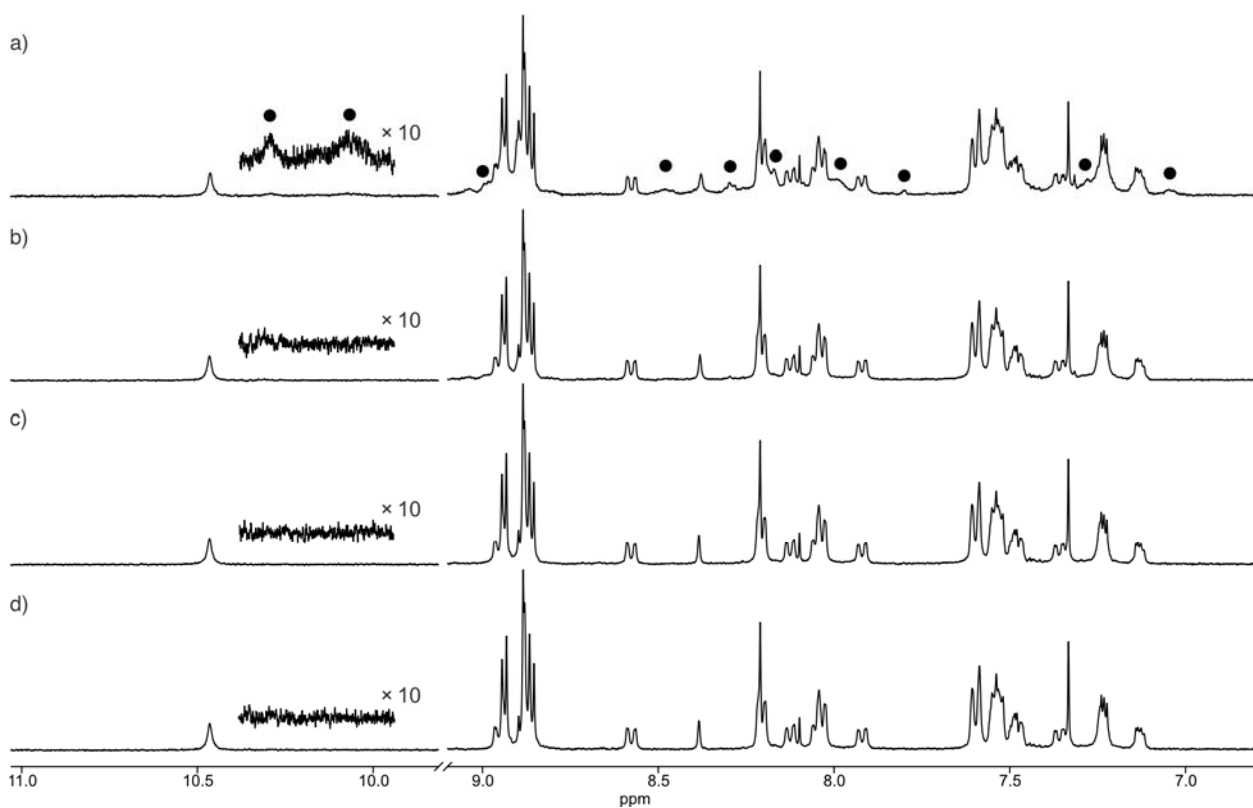

**Figure S5.** Selected region of the <sup>1</sup>H NMR spectra of a 1:1 mixture of **1-(RhI)<sub>2</sub>** and **2** (a) at initial state and after heating at 80 °C for (b) 1 min, (c) 3 min, and (d) 6 min in 1,1,2,2-tetrachloroethane-*d*<sub>2</sub>. The filled circles denote unassigned oligomeric species.



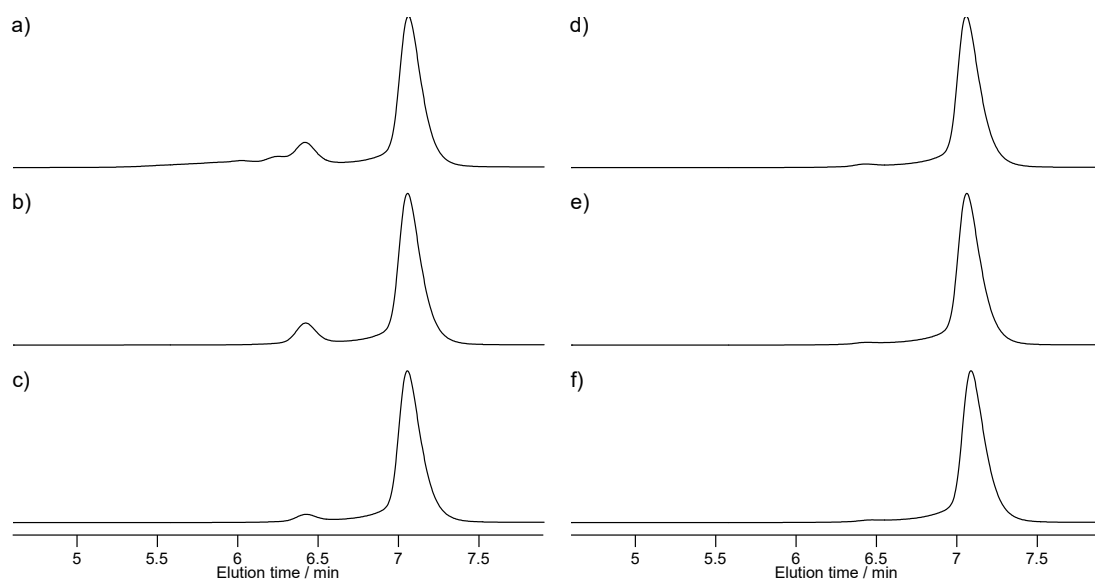

**Figure S6.** GPC chromatograms of a mixture of **1-(RhI)<sub>2</sub>** and **2** (a) at initial state and after heating at 80 °C for (b) 1 min, (c) 3 min, (d) 6 min, (e) 10 min, and (f) 30 min in 1,2-dichloroethane.

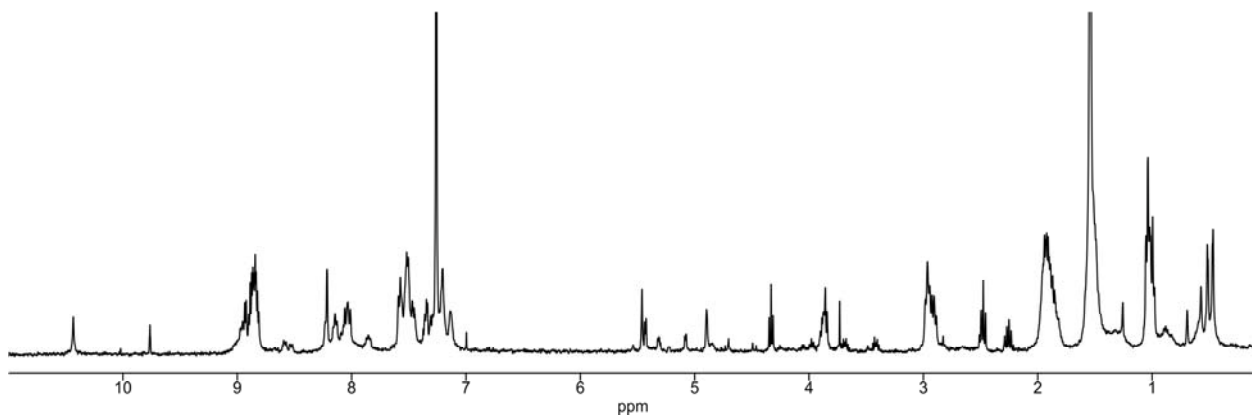

**Figure S7.**  $^1\text{H}$  NMR spectra (chloroform- $d_1$ ) of a mixture of **1-(RhI) $_2$**  and **2** after heating at 80 °C for 18h in 1,2-dichloroethane.

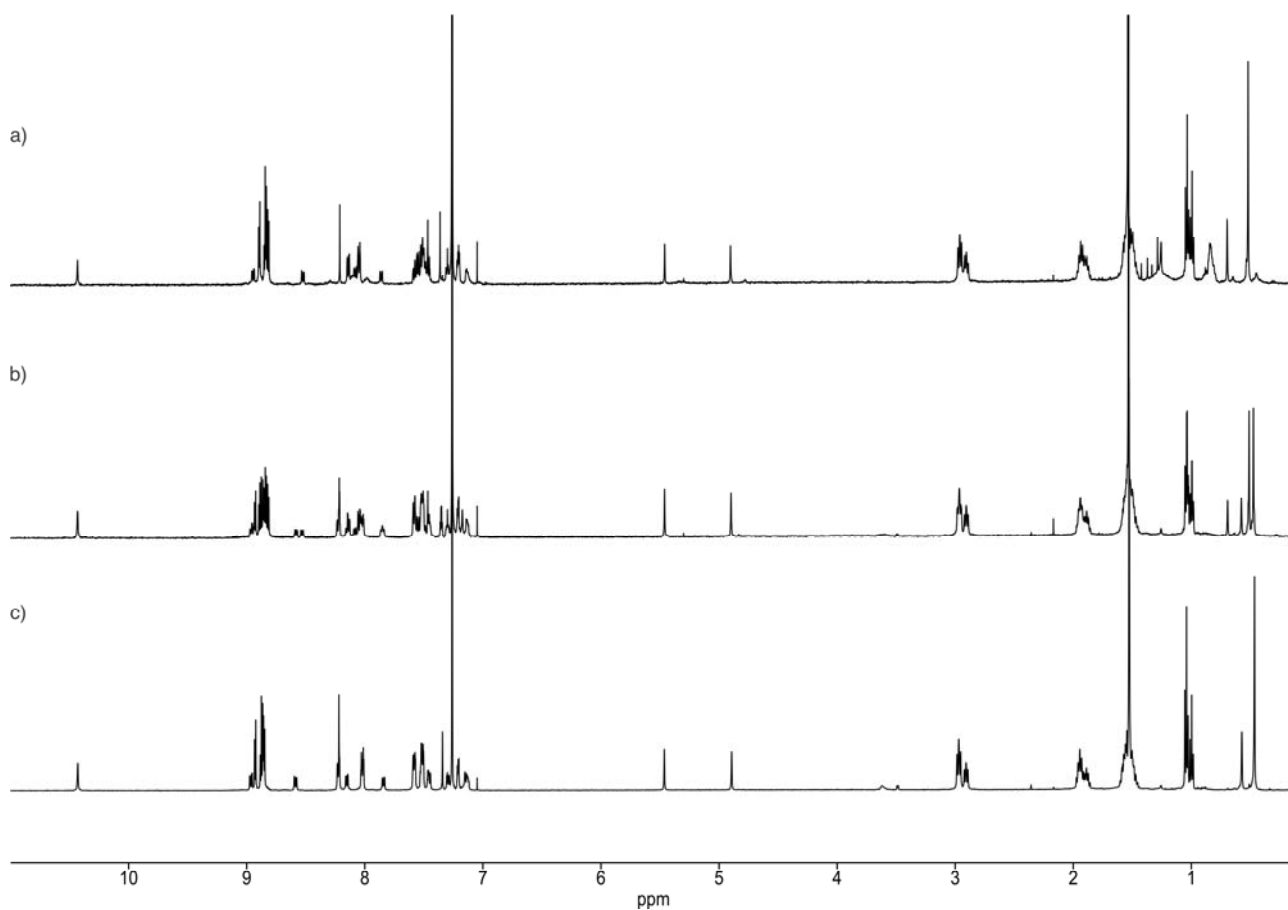

**Figure S8**  $^1\text{H}$  NMR spectra of the three fractions isolated by GPC from the reaction crude of the self-assembly of **1-(RhI) $_2$**  and **2** after heating at 80 °C for 18h in 1,2-dichloroethane: (a) fraction 1 corresponds to **1-(RhI) $_2$ •2**, (b) fraction 2 corresponds to **1-(RhI)(RhCl)•2**, and (c) fraction 3 corresponds to **1-(RhCl) $_2$ •2**.

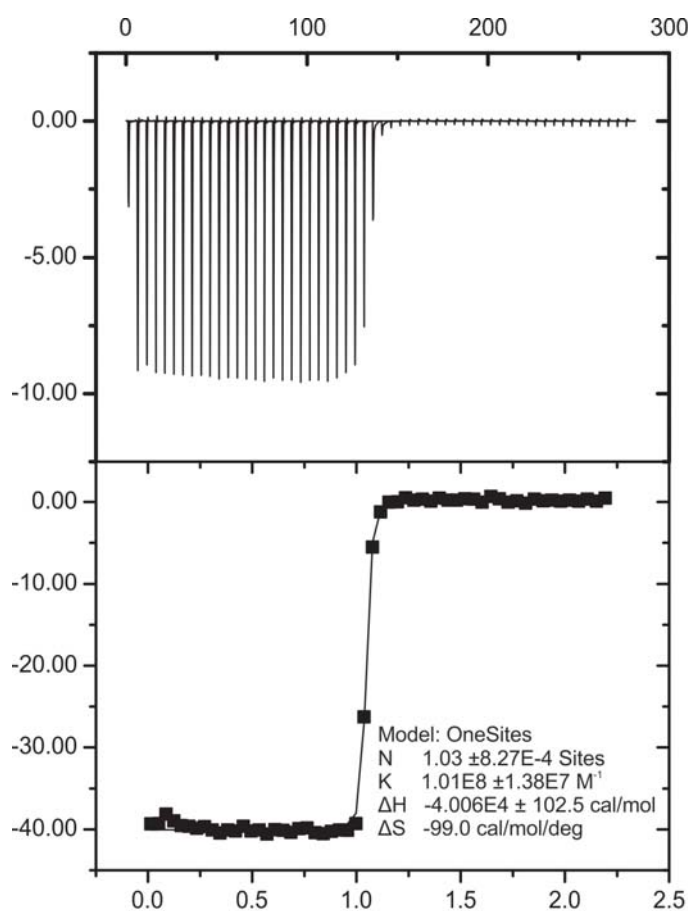

**Figure S9.** ITC data for the titration of bisporphyrin **1-(RhI)<sub>2</sub>** (0.1 mM) with bispyridine **2** (1 mM) in chloroform at 298 K. Top) ITC raw data (heat vs. time). Bottom) Integrated data fitted to a theoretical binding isotherm (solid line) for a 1:1 binding model. The formation of oligomers is not considered in the binding model.

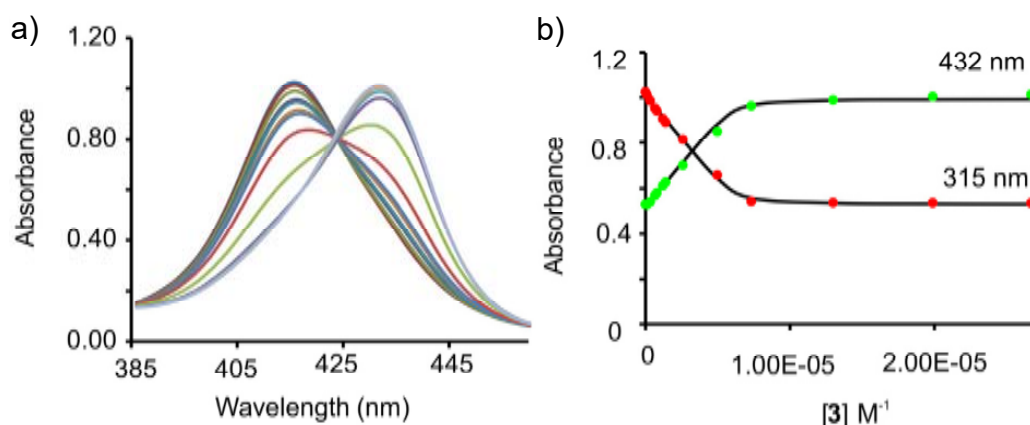

**Figure S10.** (a) UV/vis absorption spectra of **1-(RhI)<sub>2</sub>** ( $4.3 \times 10^{-6} \text{ mol L}^{-1}$ ) with **2** at 298 K. (b) Fit of the titration data at selected wavelength to a theoretical 1:1 binding model. The formation of oligomers is not considered in the binding model.

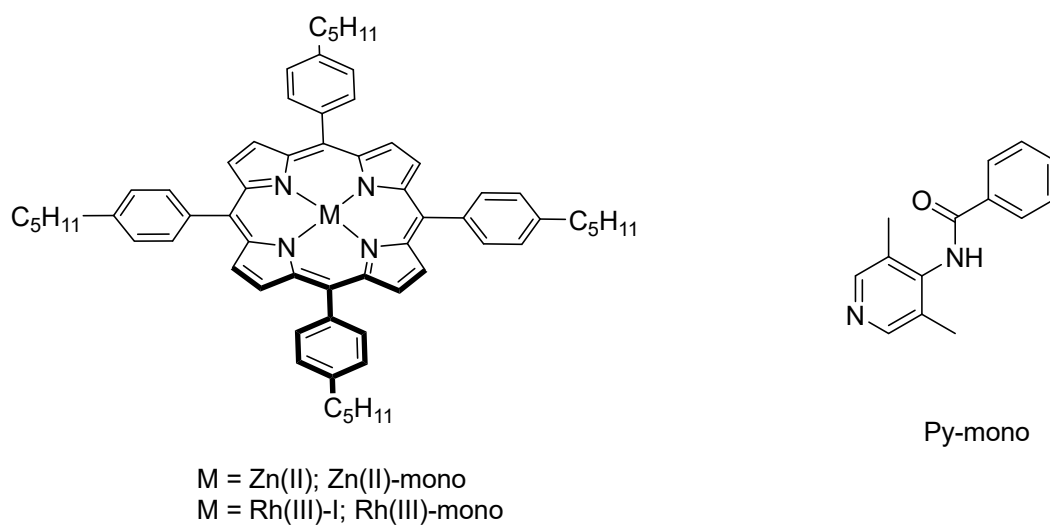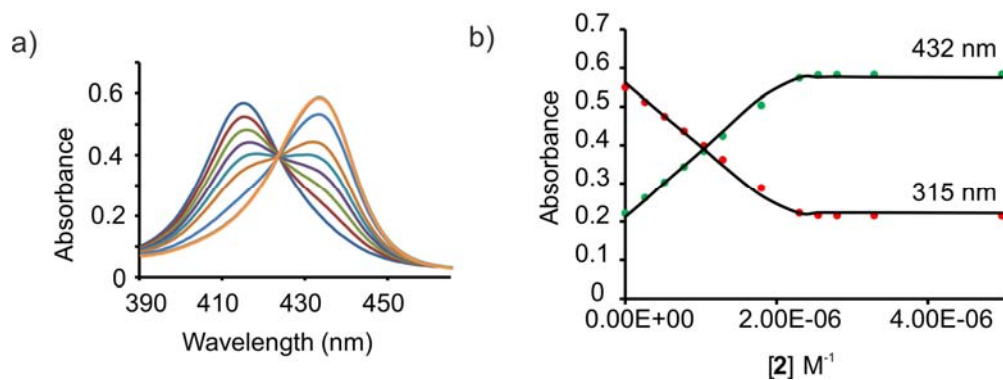

**Figure S11.** Top) Molecular structure of Rh(III) and Zn(II) monoporphyrins and pyridine ligand used to estimate the strength of the monotopic M-N<sub>py</sub> interaction ( $K_m$ ). Bottom) a) UV/vis absorption spectra of monoporphyrin **Rh(III)-mono** with **Py-mono** at 298 K. The concentration of the porphyrin was maintained constant throughout the titration ( $4.0 \times 10^{-6}$  M in a 10 mm path cell). (b) Fit of the titration data at selected wavelength to a theoretical 1:1 binding model.  $K_m(\text{Zn(II)-mono} \cdot \text{Py-mono}) = 5.6 \times 10^3 \text{ M}^{-1}$ ;  $K_m(\text{Rh(III)-mono} \cdot \text{Py-mono}) > 10^7 \text{ M}^{-1}$ .

#### 4. HRMS characterization

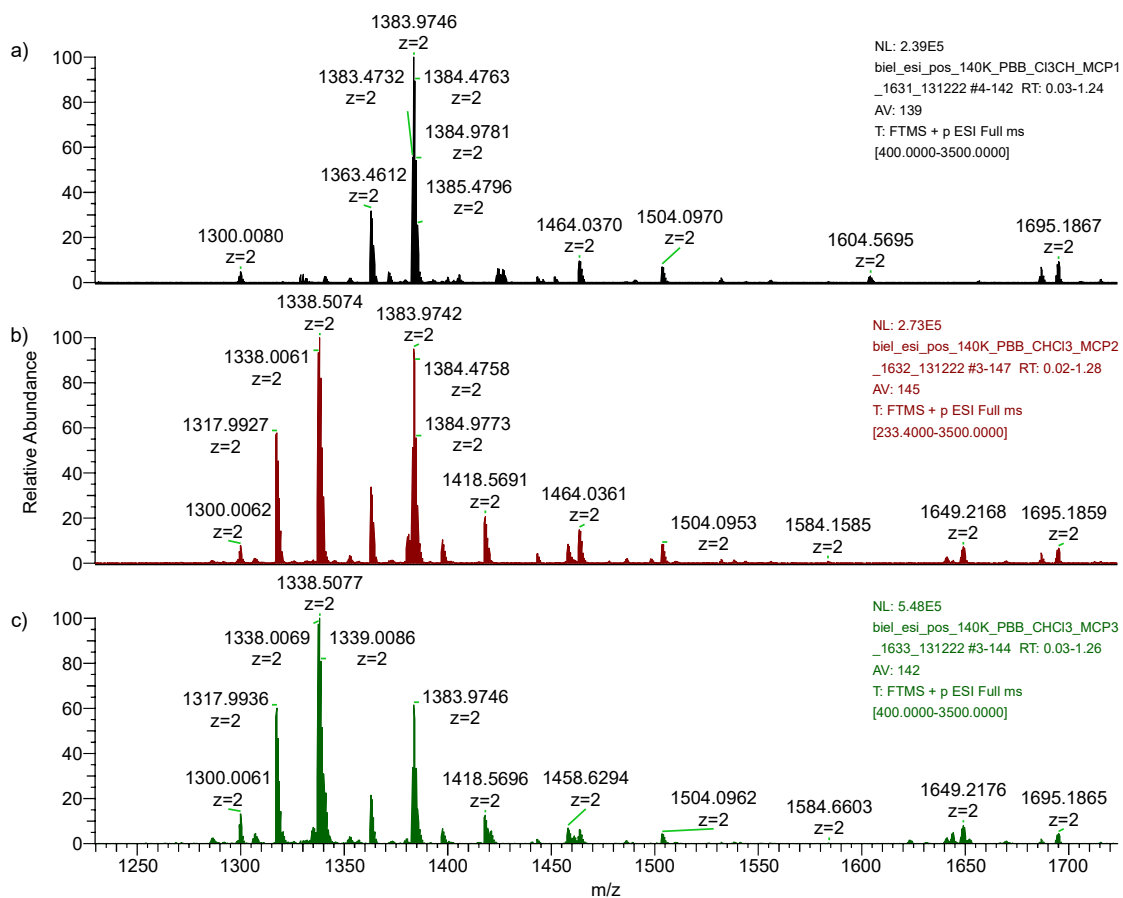

**Figure S12.** HRMS (ESI<sup>+</sup>) spectra of the different fractions isolated by GPC: (a) fraction 1 corresponds to **1-(RhI)<sub>2</sub>•2**, (b) fraction 2 corresponds to **1-(RhI)(RhCl)•2**, and (c) fraction 3 corresponds to **1-(RhCl)<sub>2</sub>•2**.

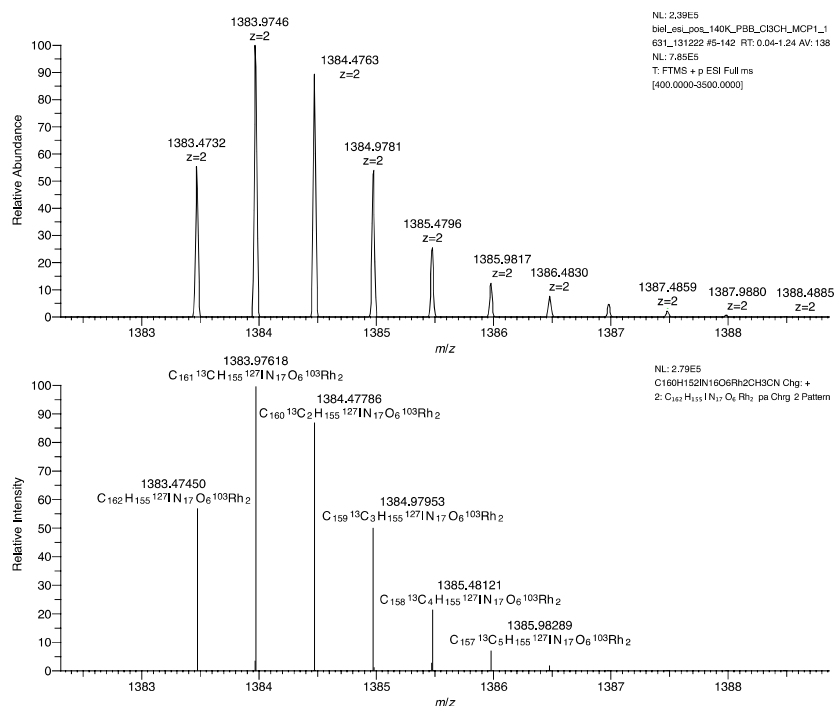

**Figure S13.** Experimental (top) and simulated (down) isotopic distribution of ion peak  $[M-I+CH_3CN]^{2+}$  (M = 1-(RhI)<sub>2</sub>•2).

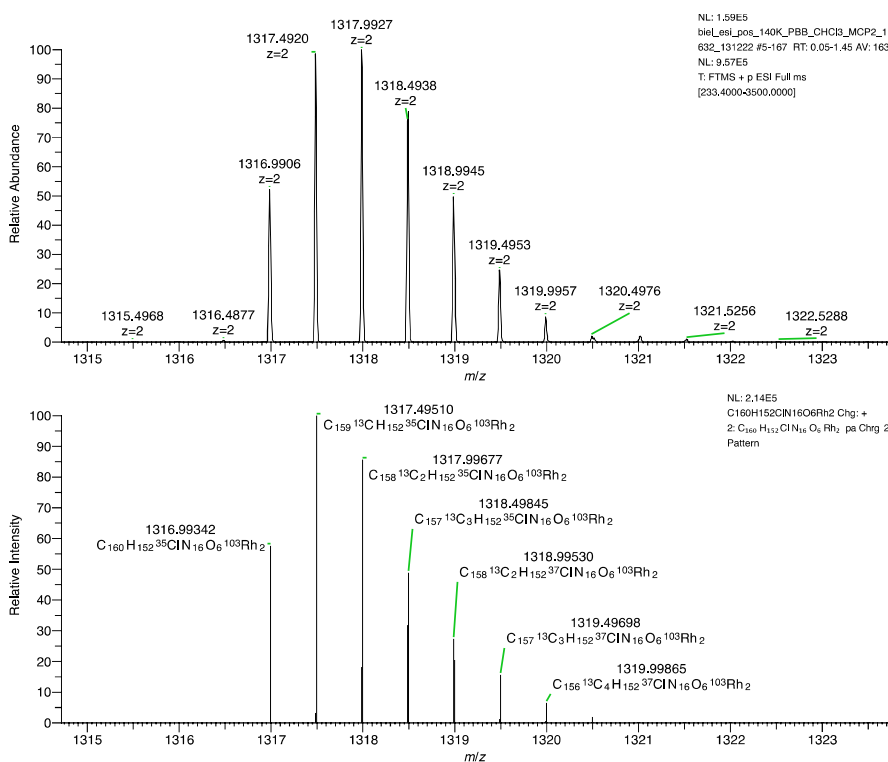

**Figure S14.** Experimental (top) and simulated (down) isotopic distribution of ion peak  $[M-I]^{2+}$  (M = 1-(RhI)(RhCl)•2).

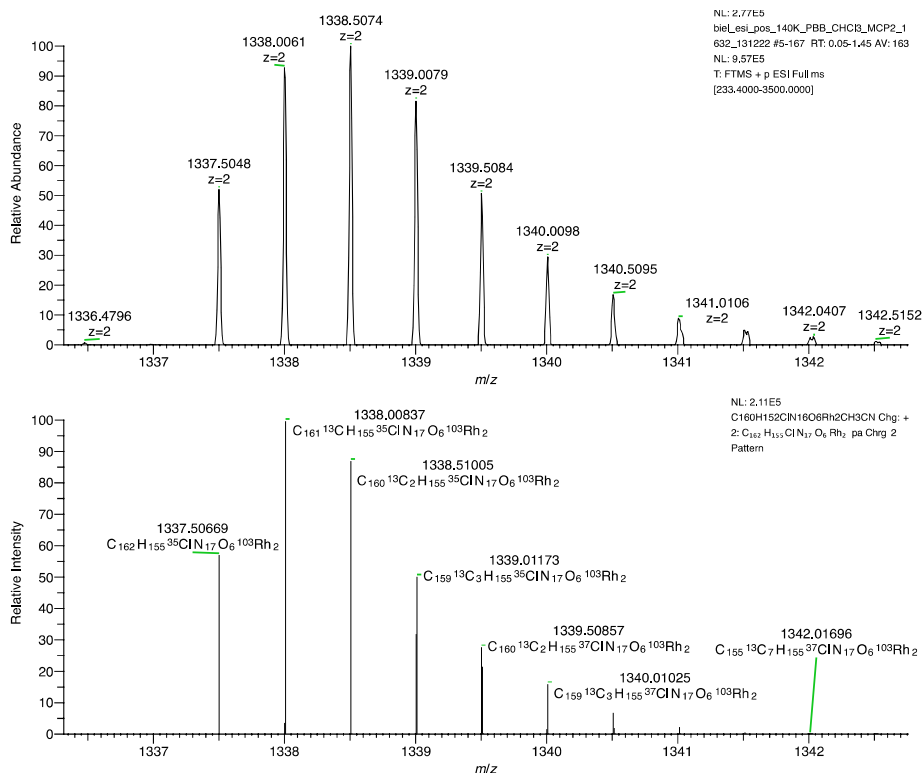

**Figure S15.** Experimental (top) and simulated (down) isotopic distribution of ion peak  $[M-I+CH_3CN]^{2+}$  ( $M = 1-(RhI)(RhCl) \cdot 2$ ).

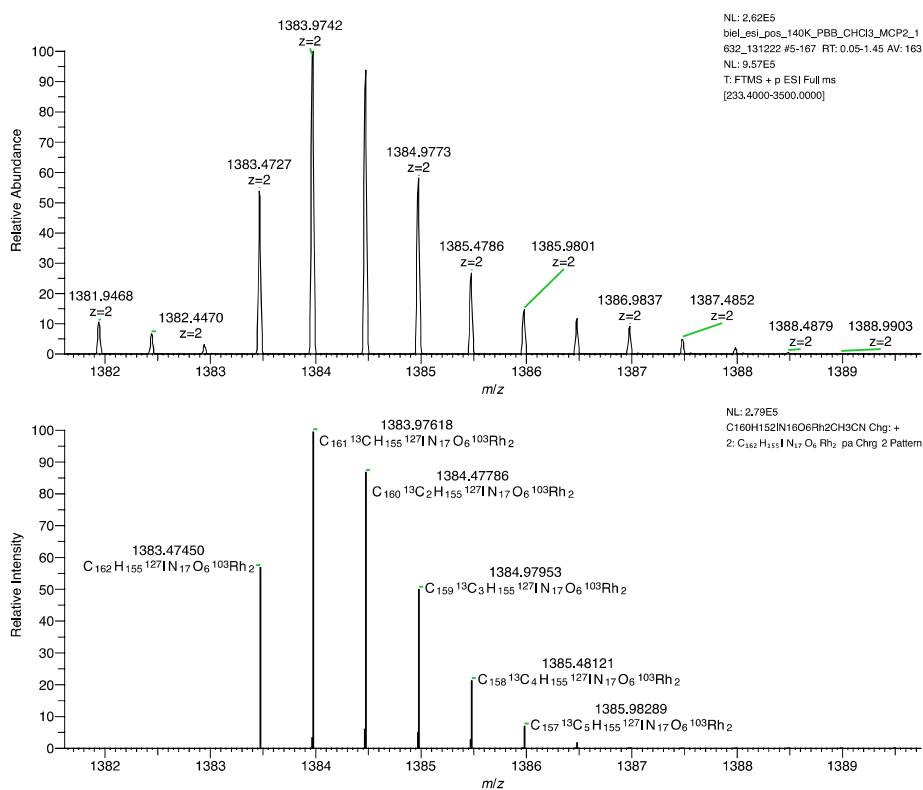

**Figure S16.** Experimental (top) and simulated (down) isotopic distribution of ion peak  $[M-Cl+CH_3CN]^{2+}$  ( $M = 1-(RhI)(RhCl) \cdot 2$ ).

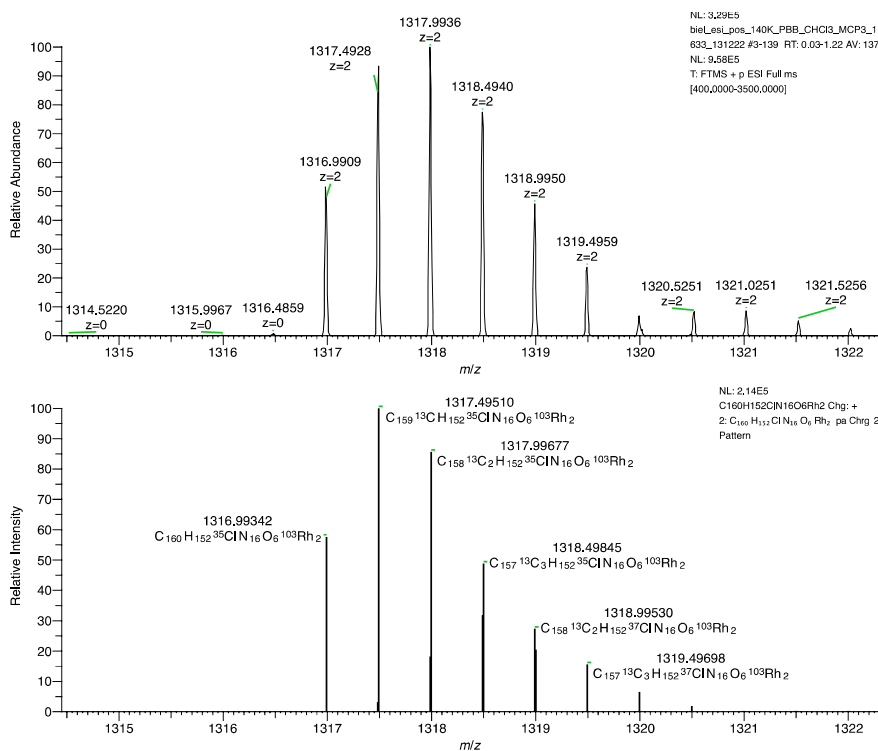

Figure S17. Experimental (top) and simulated (down) isotopic distribution of ion peak  $[M-Cl]^{2+}$  ( $M = 1-(RhCl)_2 \cdot 2$ ).

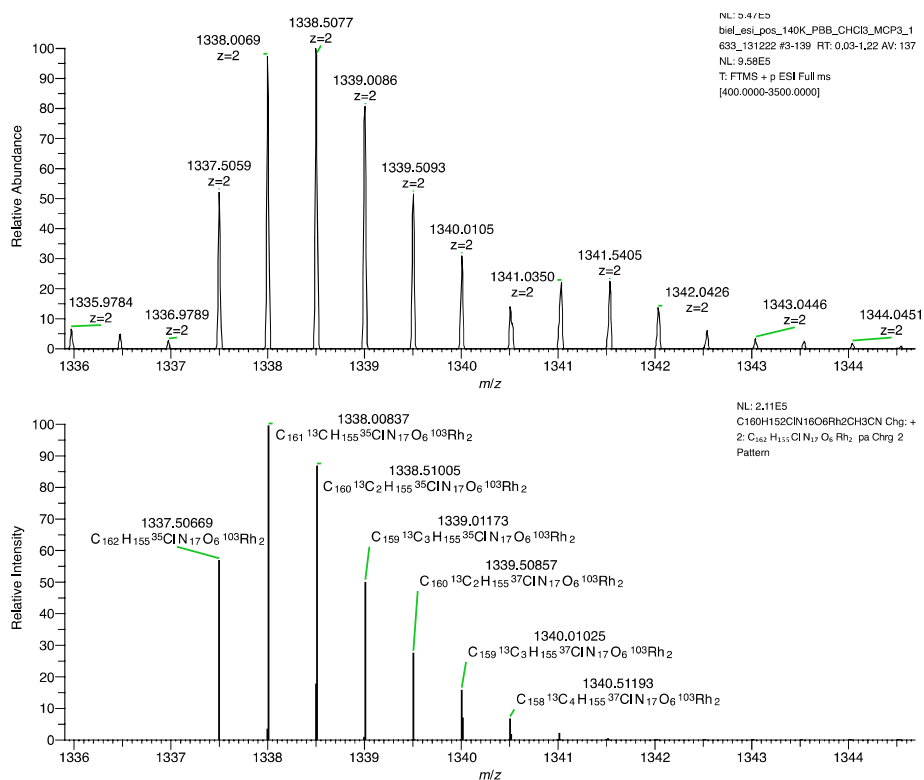

Figure S18. Experimental (top) and simulated (down) isotopic distribution of ion peak  $[M-Cl+CH_3CN]^{2+}$  ( $M = 1-(RhCl)_2 \cdot 2$ ).



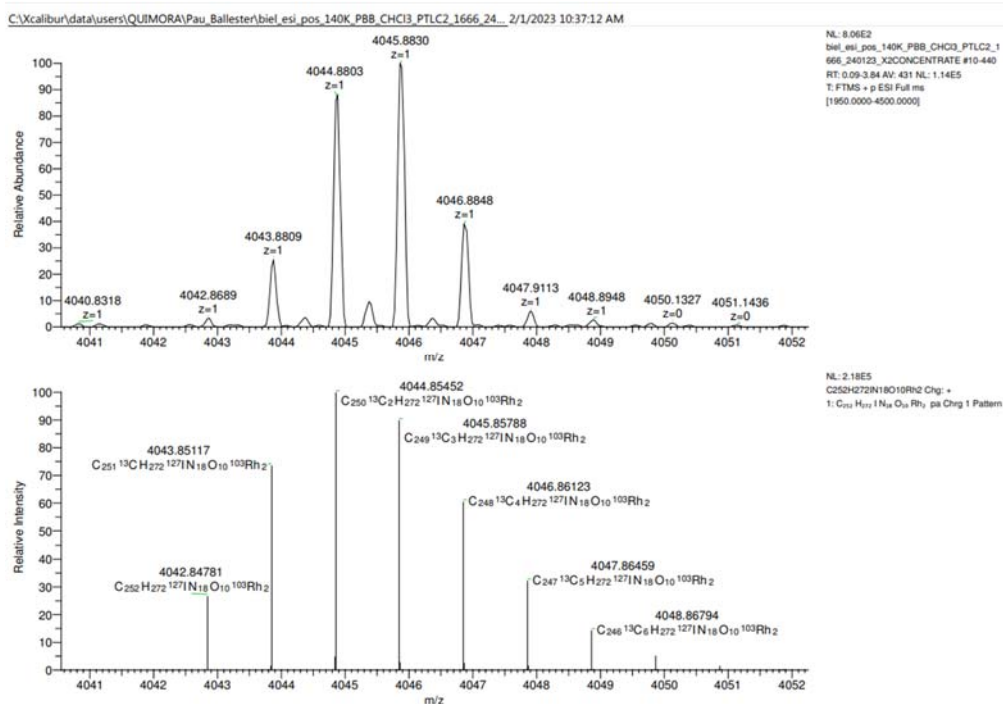

**Figure S19.** Experimental (top) and simulated (down) isotopic distribution of ion peak  $[M-I]^+$  ( $M = 3bC[1-(RhI)_2 \cdot 2]$ ).

## 5. $^1\text{H}$ NMR variable temperature studies

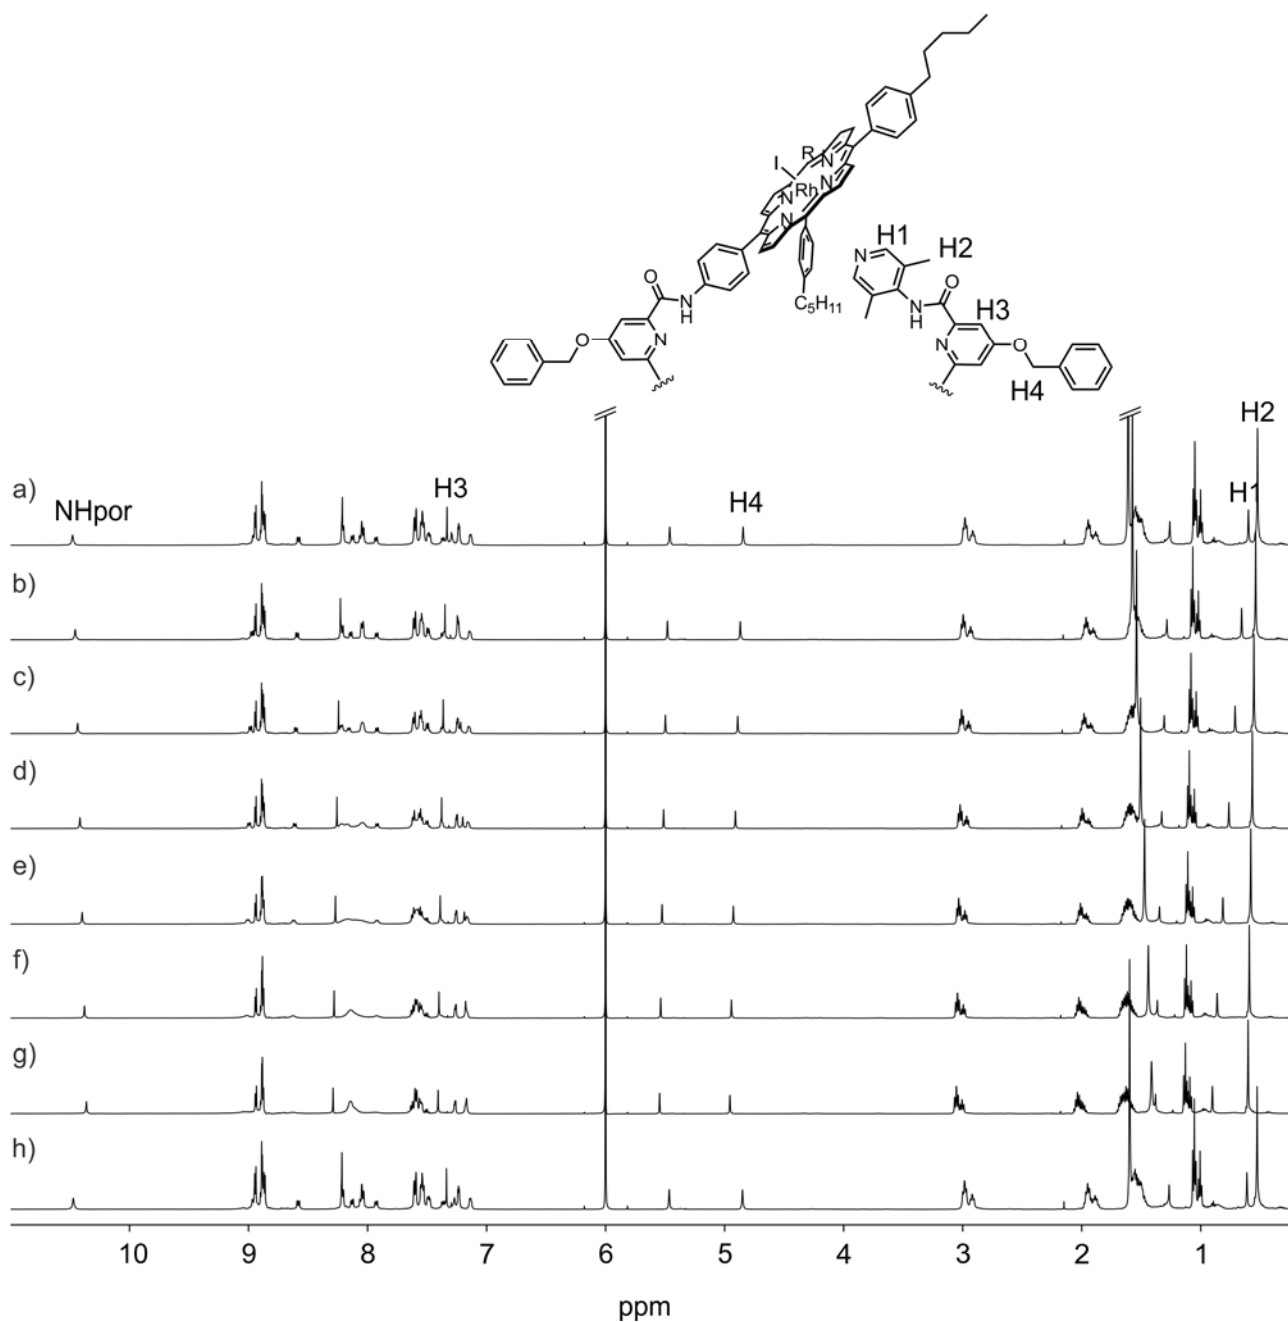

**Figure S20.** Variable temperature  $^1\text{H}$  NMR spectra (500 MHz) of macrocycle  $1-(\text{RhI})_2\cdot 2$  at (a) 293, (b) 313, (c) 333, (d) 353, (e) 373, (f) 393, (g) 413, and (h) 298 K in 1,1,2-tetrachloroethane- $d_2$ . Spectrum (h) is after cooling down the solution from 413 K to 298 K.

## 6. Binding studies involving macrocycle 1-(RhI)<sub>2</sub>•2 and adipamide 3a

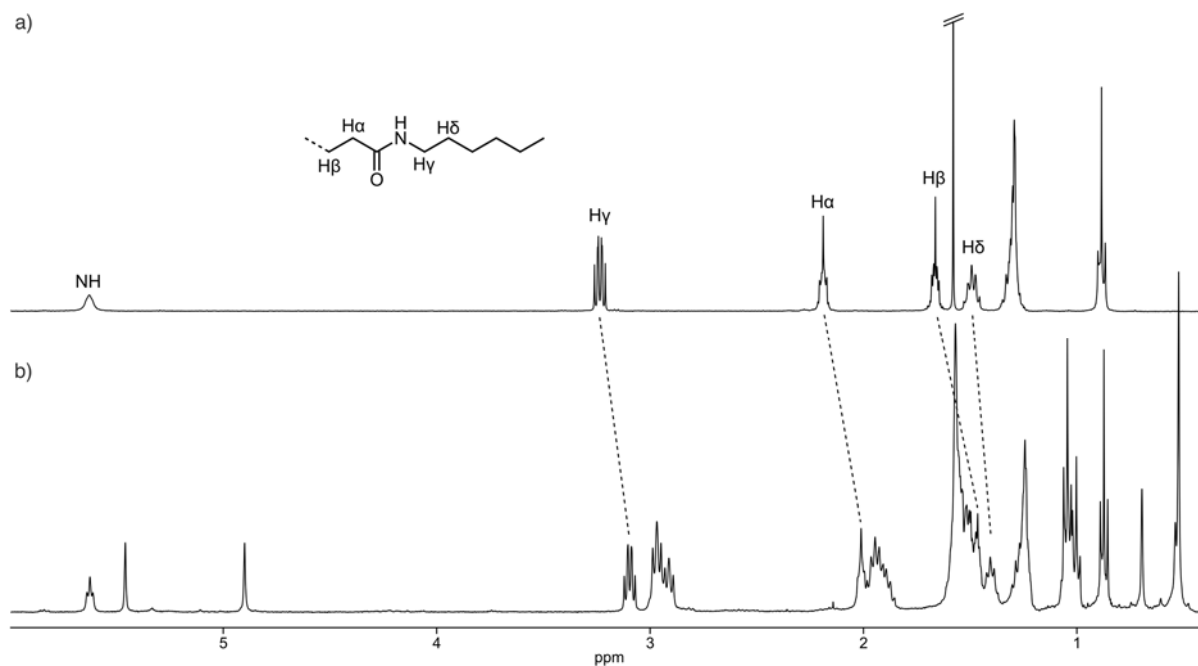

**Figure S21.** <sup>1</sup>H NMR spectra (400 MHz, 298 K) of (a) diamide **3a** ( $5.0 \times 10^{-3}$  mol L<sup>-1</sup>) and (b) a 1:1 mixture of **3a** and **1-(RhI)<sub>2</sub>•2** in chloroform-*d*.

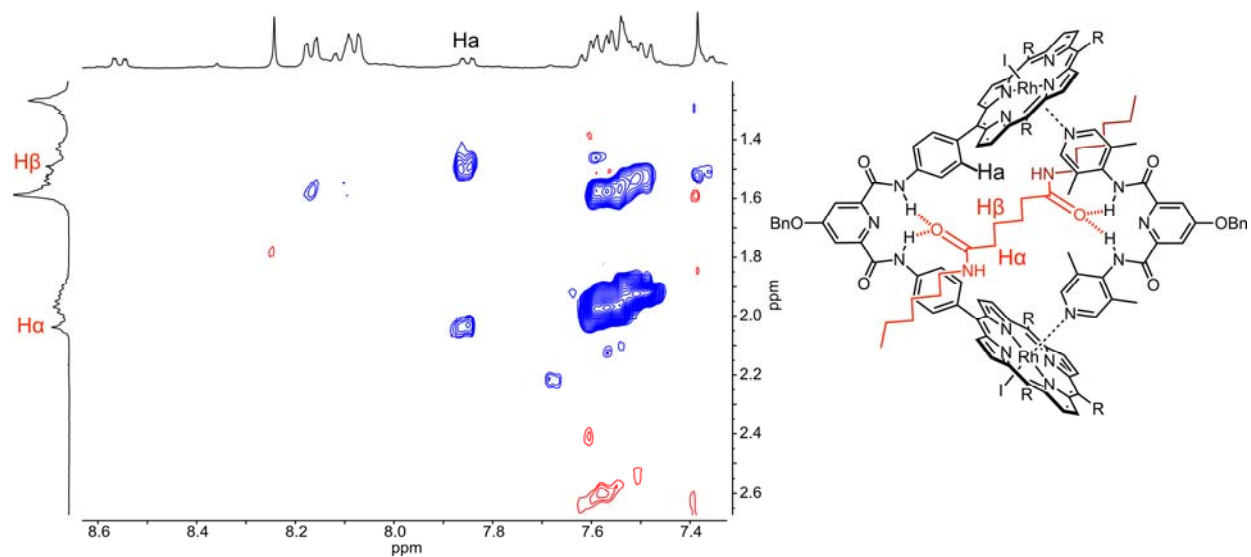

**Figure S22.** Selected region of the ROESY spectrum (400 MHz, 298 K) of a 1:1 mixture of **3a** and **1-(RhI)<sub>2</sub>•2** in chloroform-*d*.

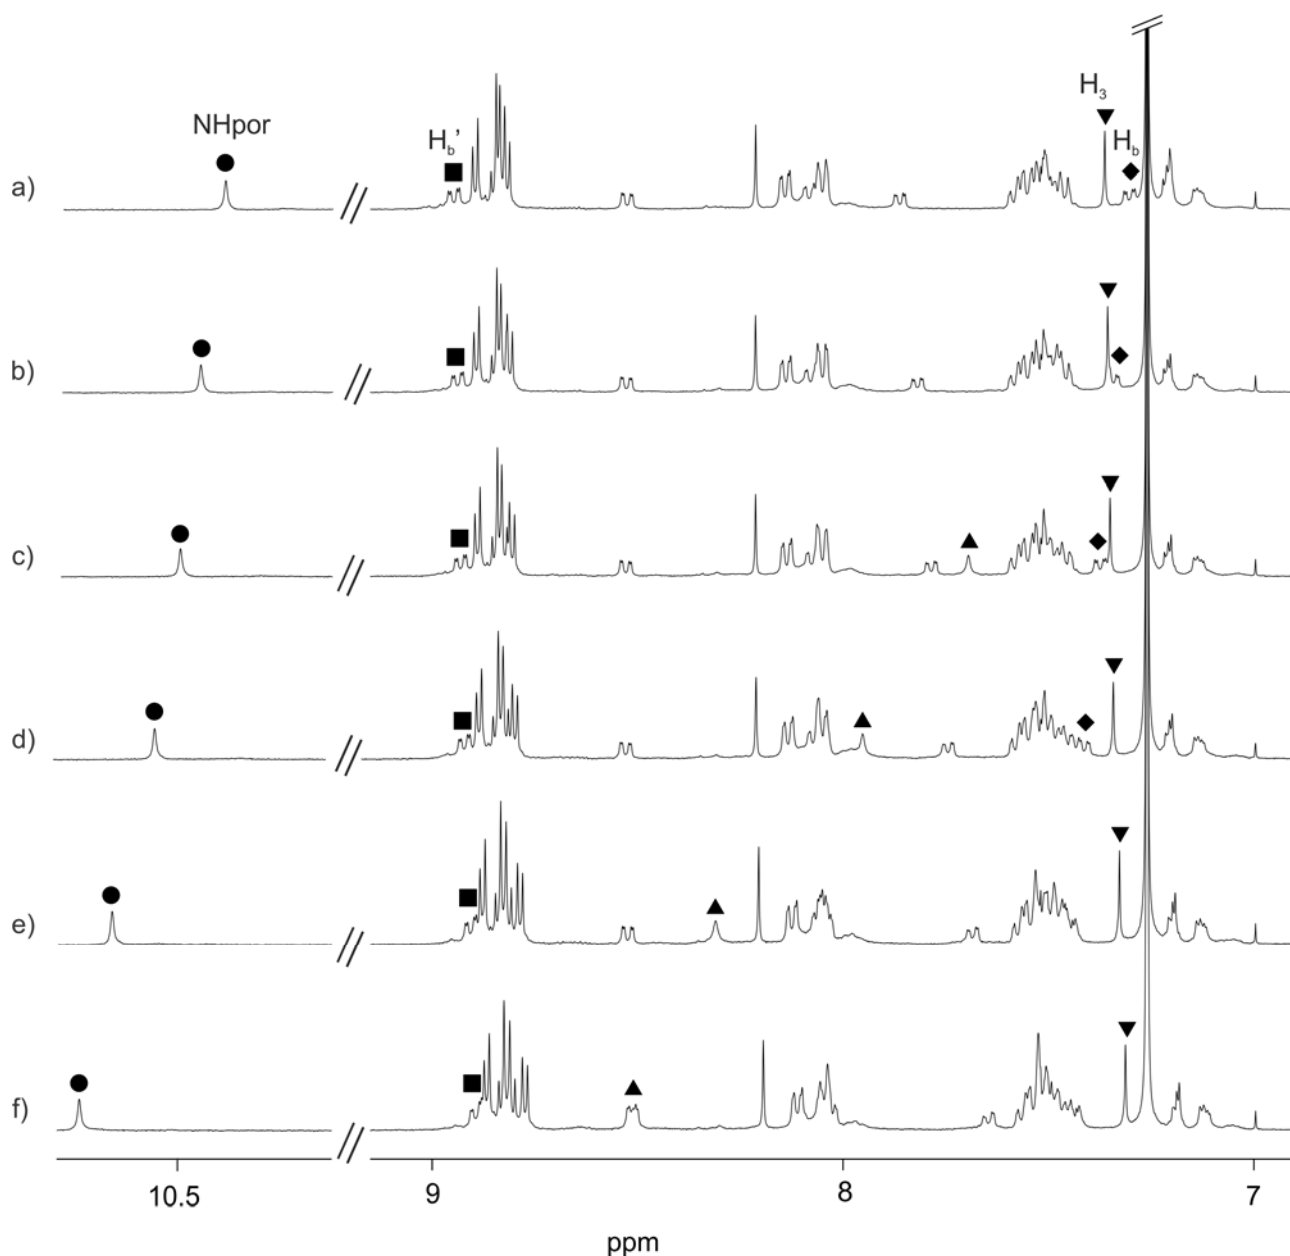

**Figure S23.**  $^1\text{H}$  NMR spectra (400 MHz, 298 K) of macrocycle **1-(RhI) $_2$ ·2** ( $9.9 \times 10^{-4}$  mol L $^{-1}$ ) upon addition of diamide **3a** in chloroform-*d*. (a) 0, (b) 4.7, (c) 9.9, (d) 20, (e) 51, (f) 102 equiv. of **3a**. For proton assignment see Figure S17.

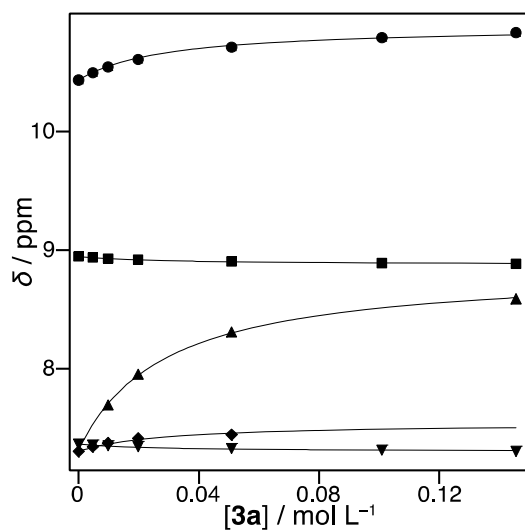

**Figure S24.** Chemical shift changes of selected proton signals of macrocycle **1-(RhI)<sub>2</sub>•2** upon incremental additions of diamide **3a** (circles squares, triangles and diamonds) and fit of the titration data to a theoretical 1:1 model (solid line).  $K_{\text{pseudo}} = 36 \text{ M}^{-1}$ . For proton assignment see Figure S20.

## 7. Binding studies involving macrocycle 1-(RhI)<sub>2</sub>•2 and adipamide 3b

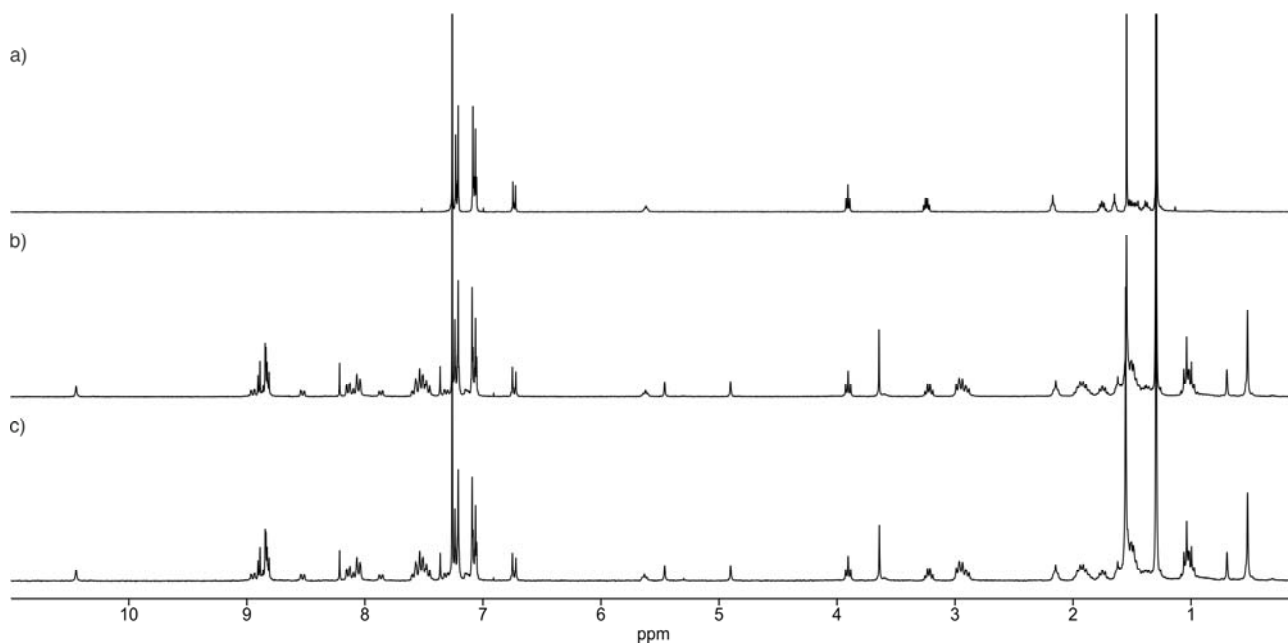

**Figure S25.** <sup>1</sup>H NMR spectra (300 MHz, 298 K) of (a) diamide **3b** ( $2.0 \times 10^{-3} \text{ mol L}^{-1}$ ) and (b) a 1:1 mixture of **3b** and 1-(RhI)<sub>2</sub>•2 in chloroform-*d*.

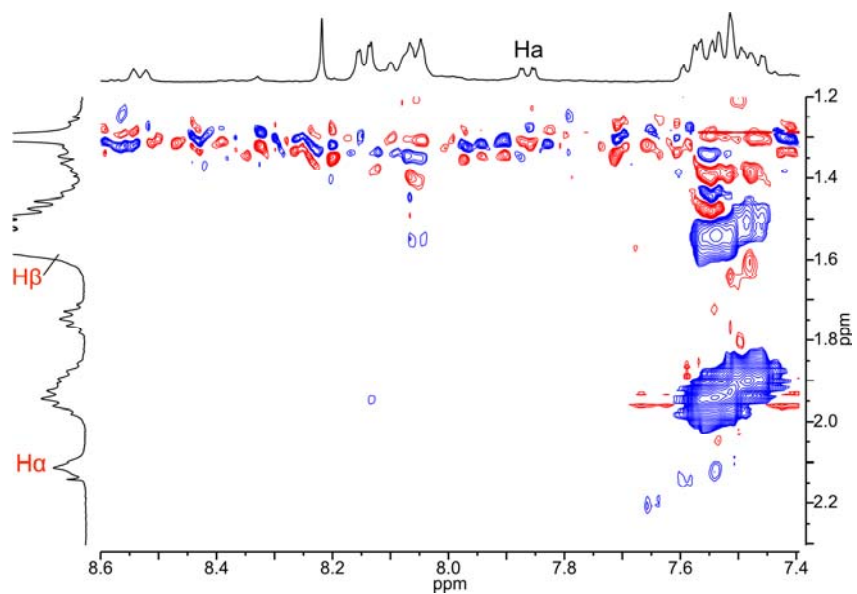

**Figure S26.** Selected region of the ROESY spectrum (400 MHz, 298 K) of a 1:1 mixture of **3b** and 1-(RhI)<sub>2</sub>•2 in chloroform-*d*.

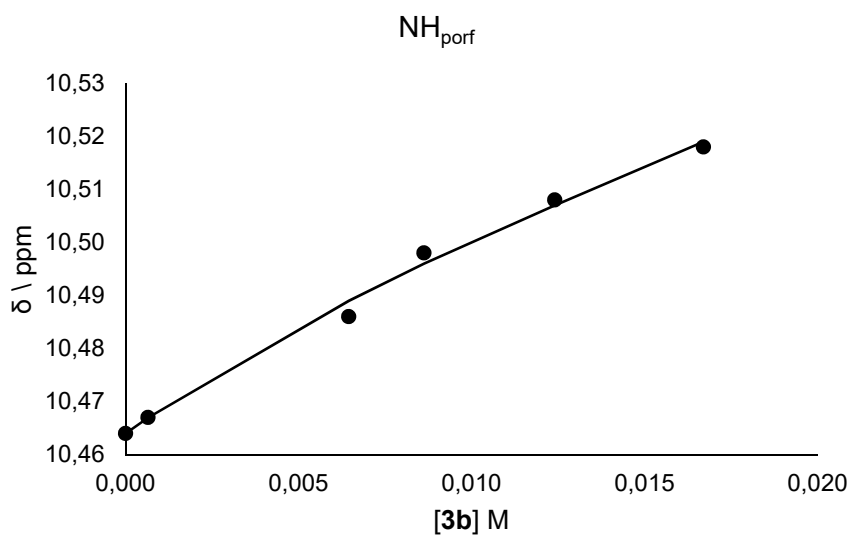

**Figure S27.** Chemical shift changes of the NH amide protons of the bis-porphyrin in macrocycle **1-(RhI)<sub>2</sub>·2** upon incremental additions of diamide **3b** (circles) and fit of the titration data to a theoretical 1:1 model (solid line).  $K_{\text{exo}} = 18 \text{ M}^{-1}$ .

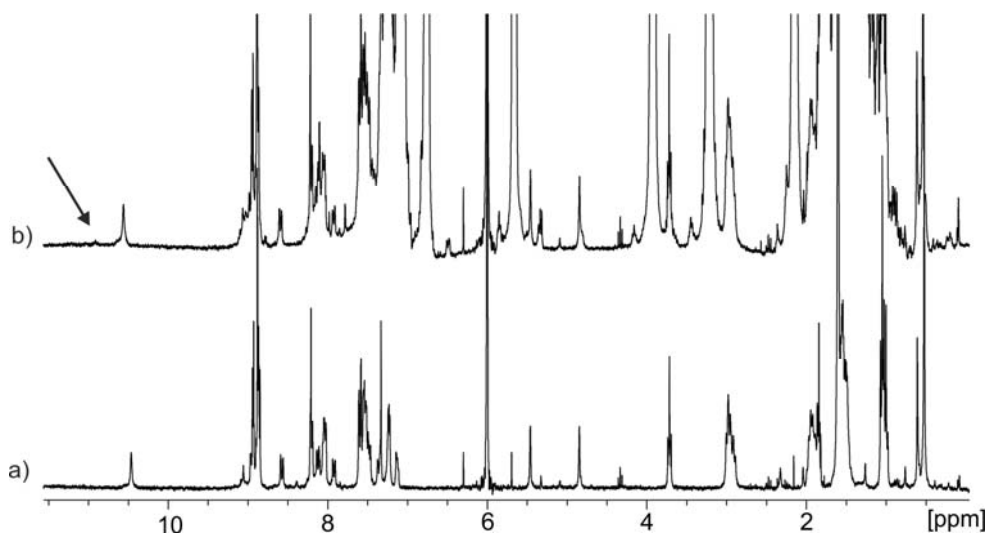

**Figure S28.**  $^1\text{H}$  NMR spectra of a 1 mM solution of macrocycle **1-(RhI)<sub>2</sub>·2** before (a) and after (b) the addition of 40 equiv. of **3b** and heating overnight to 80°C.

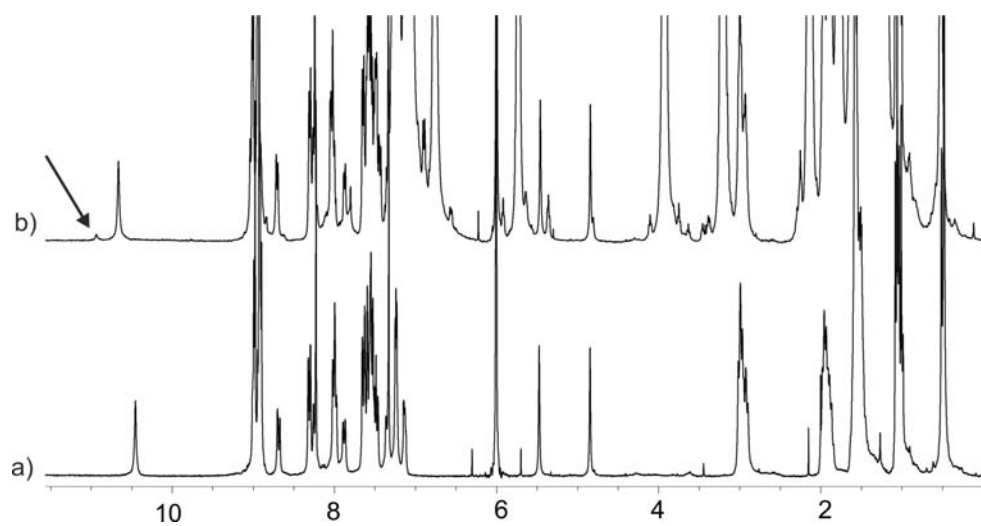

**Figure S29.** <sup>1</sup>H NMR spectra of a 4 mM solution of macrocycle **1-(RhCl)<sub>2</sub>•2** before (a) and after (b) the addition of 15 equiv. of **3b** and heating overnight to 80°C.



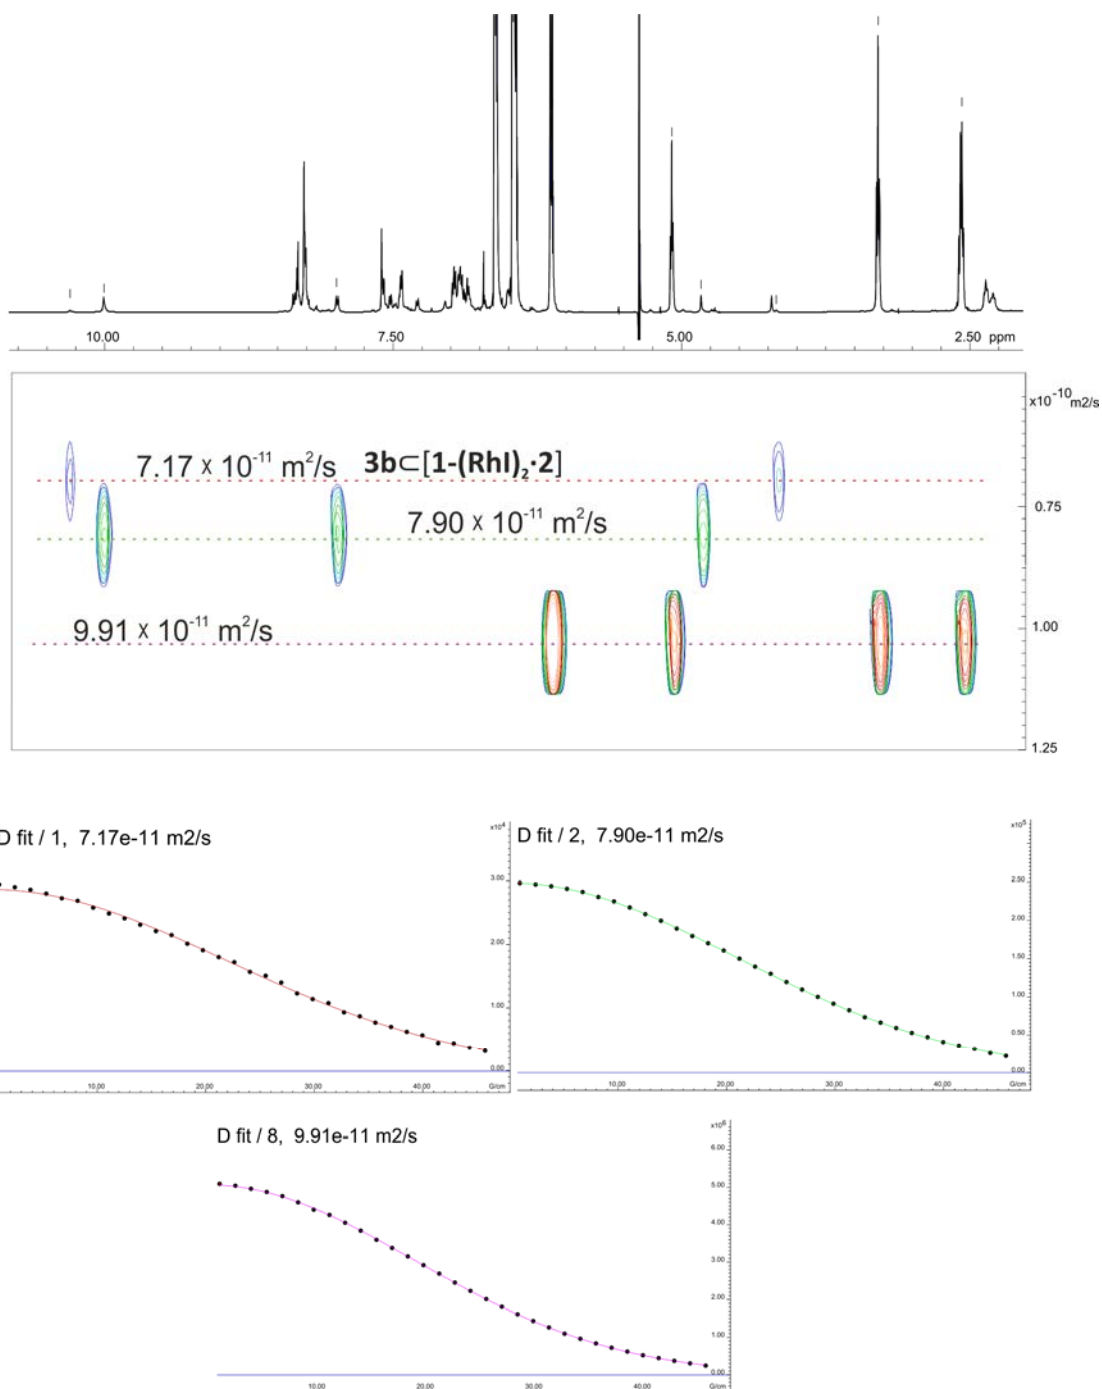

**Figure S30.** Top) Selected region of the <sup>1</sup>H pseudo-2D-plot of DOSY (500 MHz with cryoprobe, (CDCl<sub>2</sub>)<sub>2</sub>, 298 K, Δ = 150 ms, diffusion axis not shown in logarithmic scale). The selected peaks correspond to proton signals of the **3b**@[1-(RhI)<sub>2</sub>•2] rotaxane (10.9 ppm), and to the macrocycle [1-(RhI)<sub>2</sub>•2] (10.4 ppm) and lineal component **3b** (2.8 ppm). The latter two are involved in fast exchange on the DOSY timescale between free and bound states in the exo-complex **3b**@[1-(RhI)<sub>2</sub>•2]. Bottom) Fits of the decays of a selected signal of each species to the mono-exponential Stejskal–Tanner function.

## 8. NMR characterization

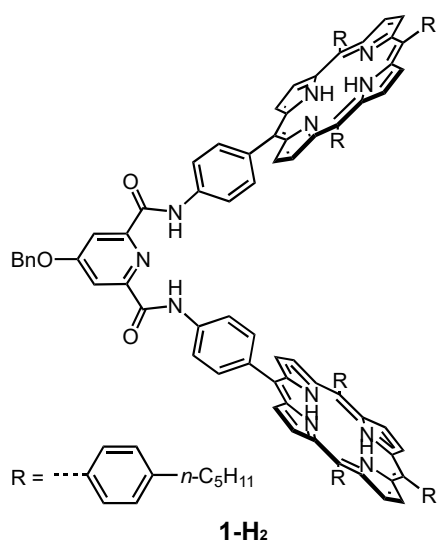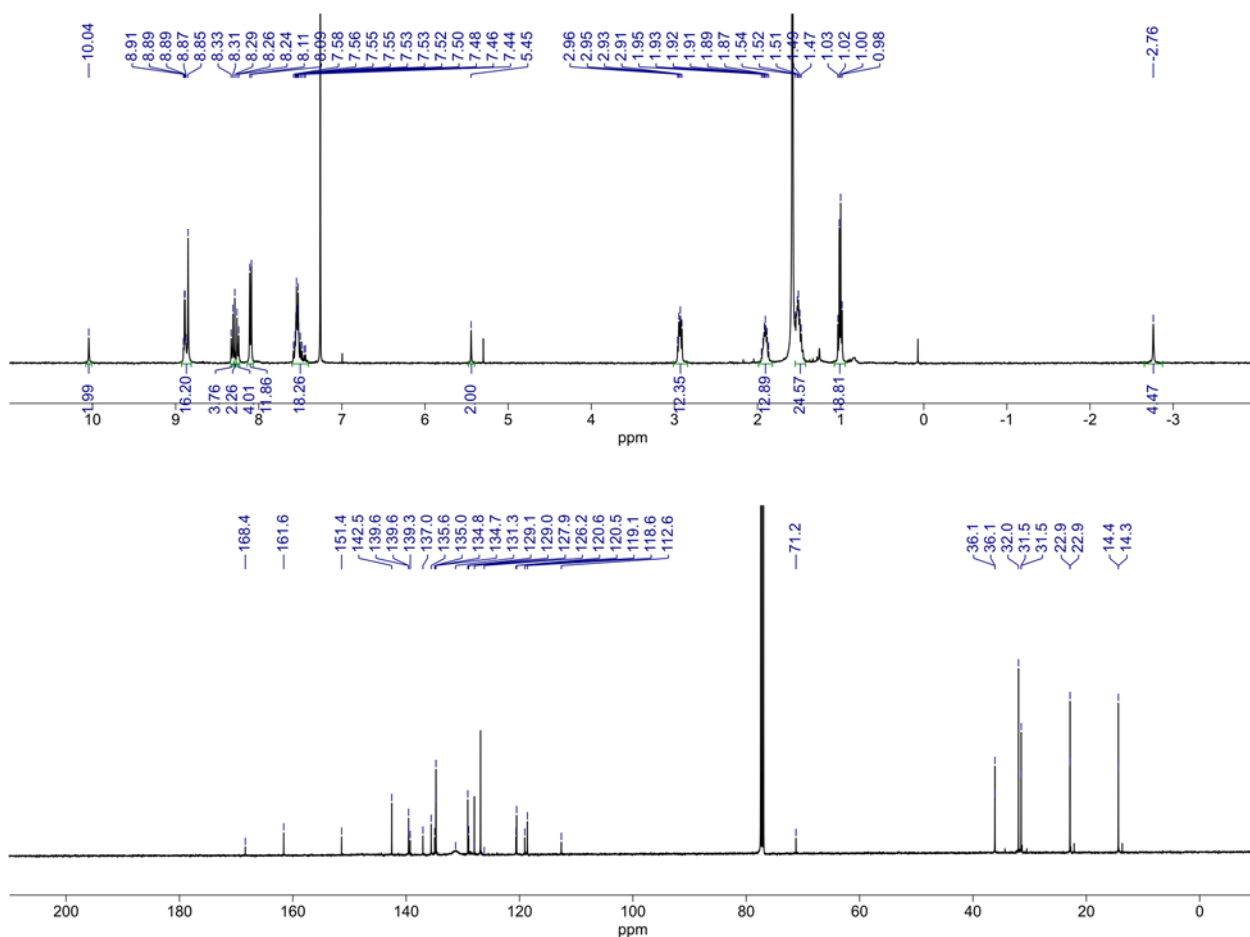

**Figure S31.** <sup>1</sup>H (400 MHz, 298 K) and <sup>13</sup>C{<sup>1</sup>H} (125 MHz, 298 K) NMR spectra of **1-H<sub>2</sub>** in chloroform-*d*.

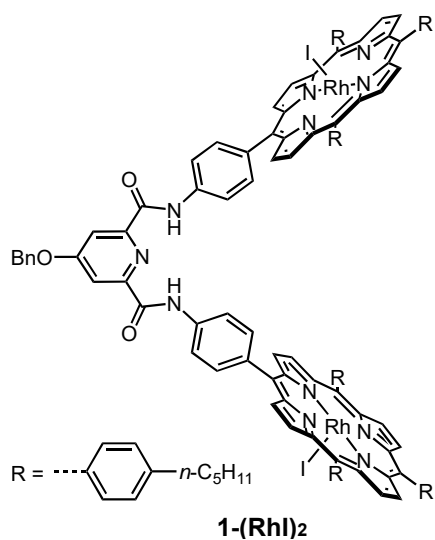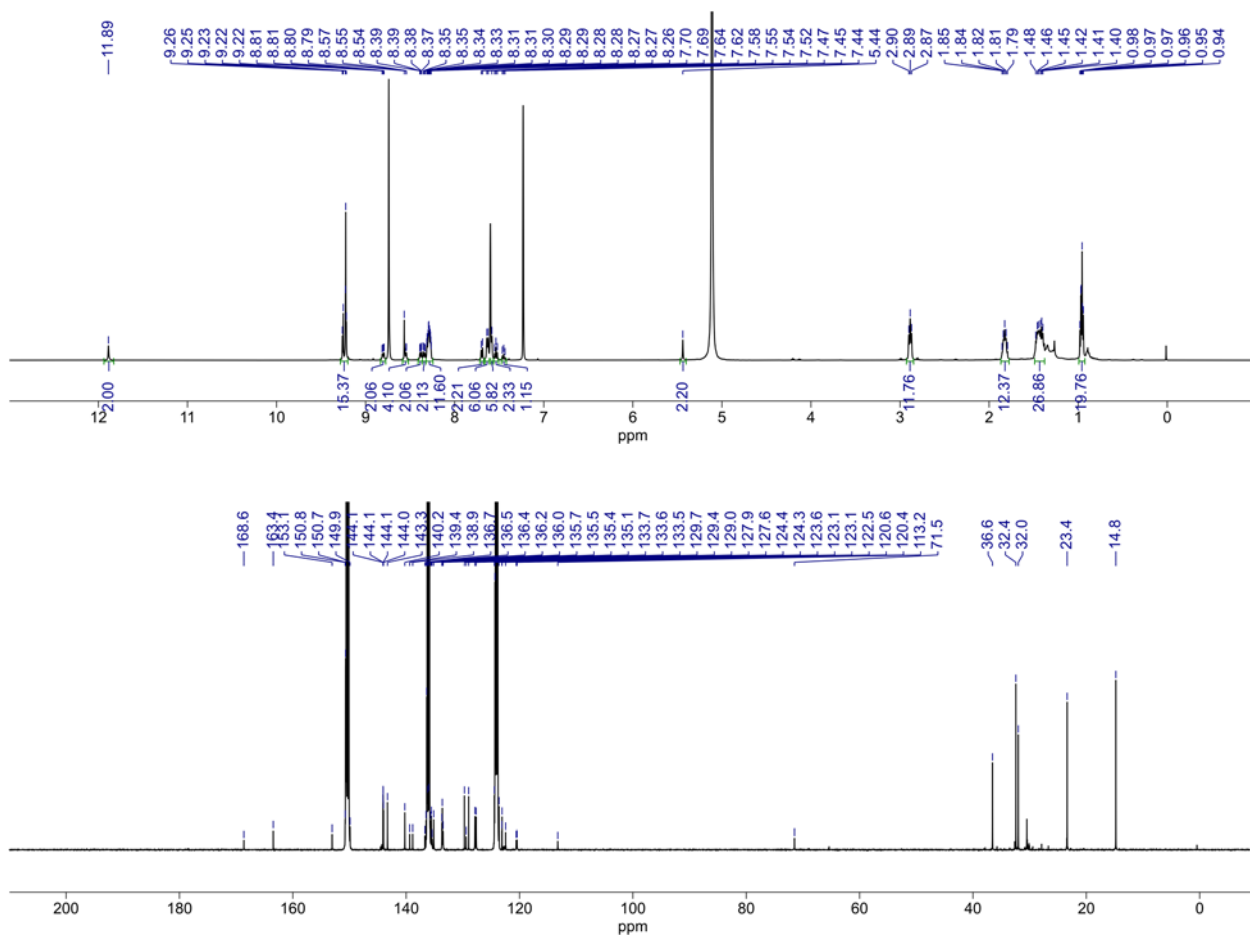

**Figure S32.** <sup>1</sup>H (400 MHz, 298 K) and <sup>13</sup>C{<sup>1</sup>H} (125 MHz, 298 K) NMR spectra of **1-(RhI)<sub>2</sub>** in pyridine-*d*<sub>5</sub>.

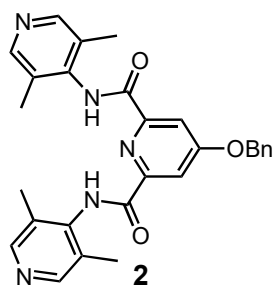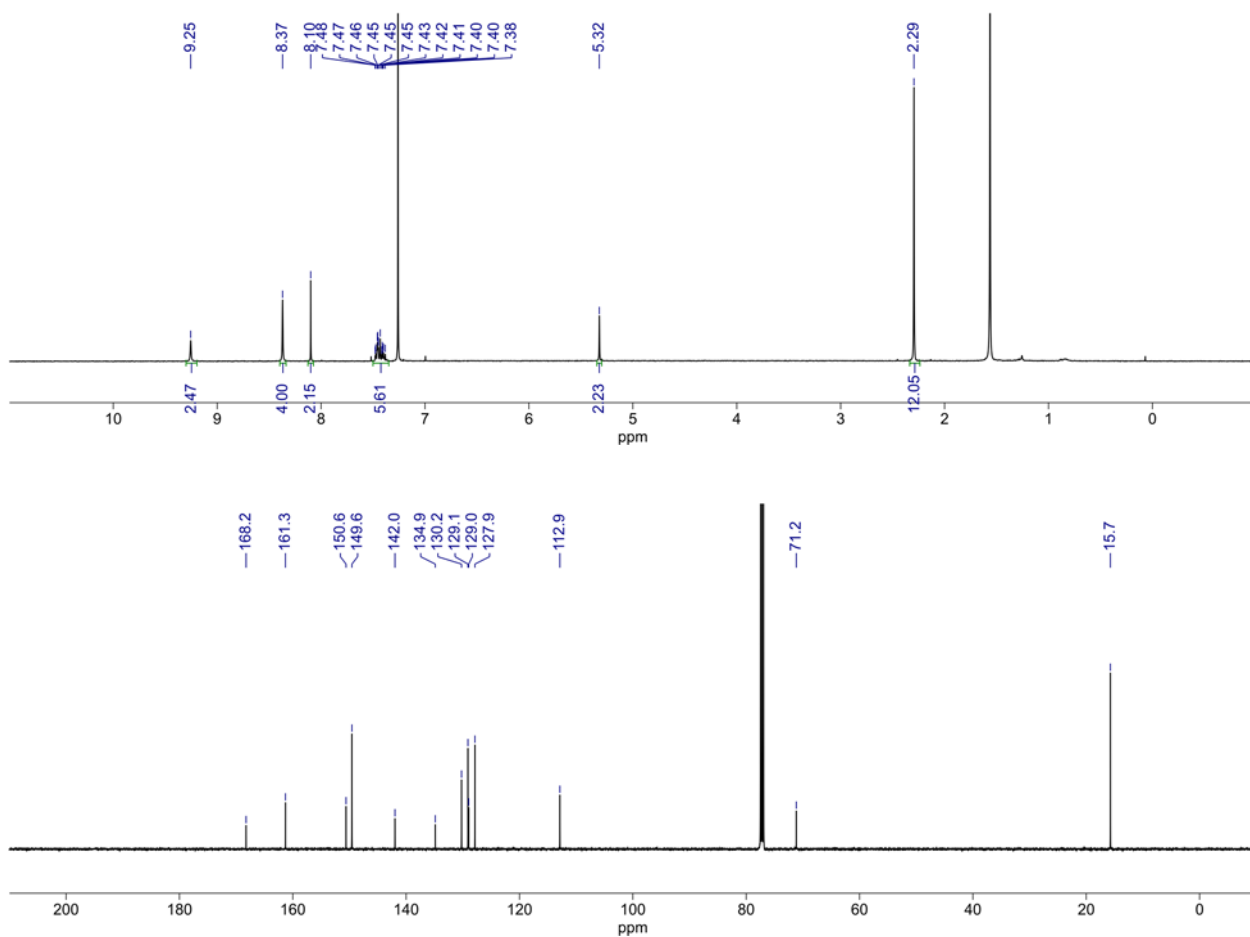

**Figure S33.**  $^1\text{H}$  (400 MHz, 298 K) and  $^{13}\text{C}\{^1\text{H}\}$  (125 MHz, 298 K) NMR spectra of **2** in chloroform-*d*.

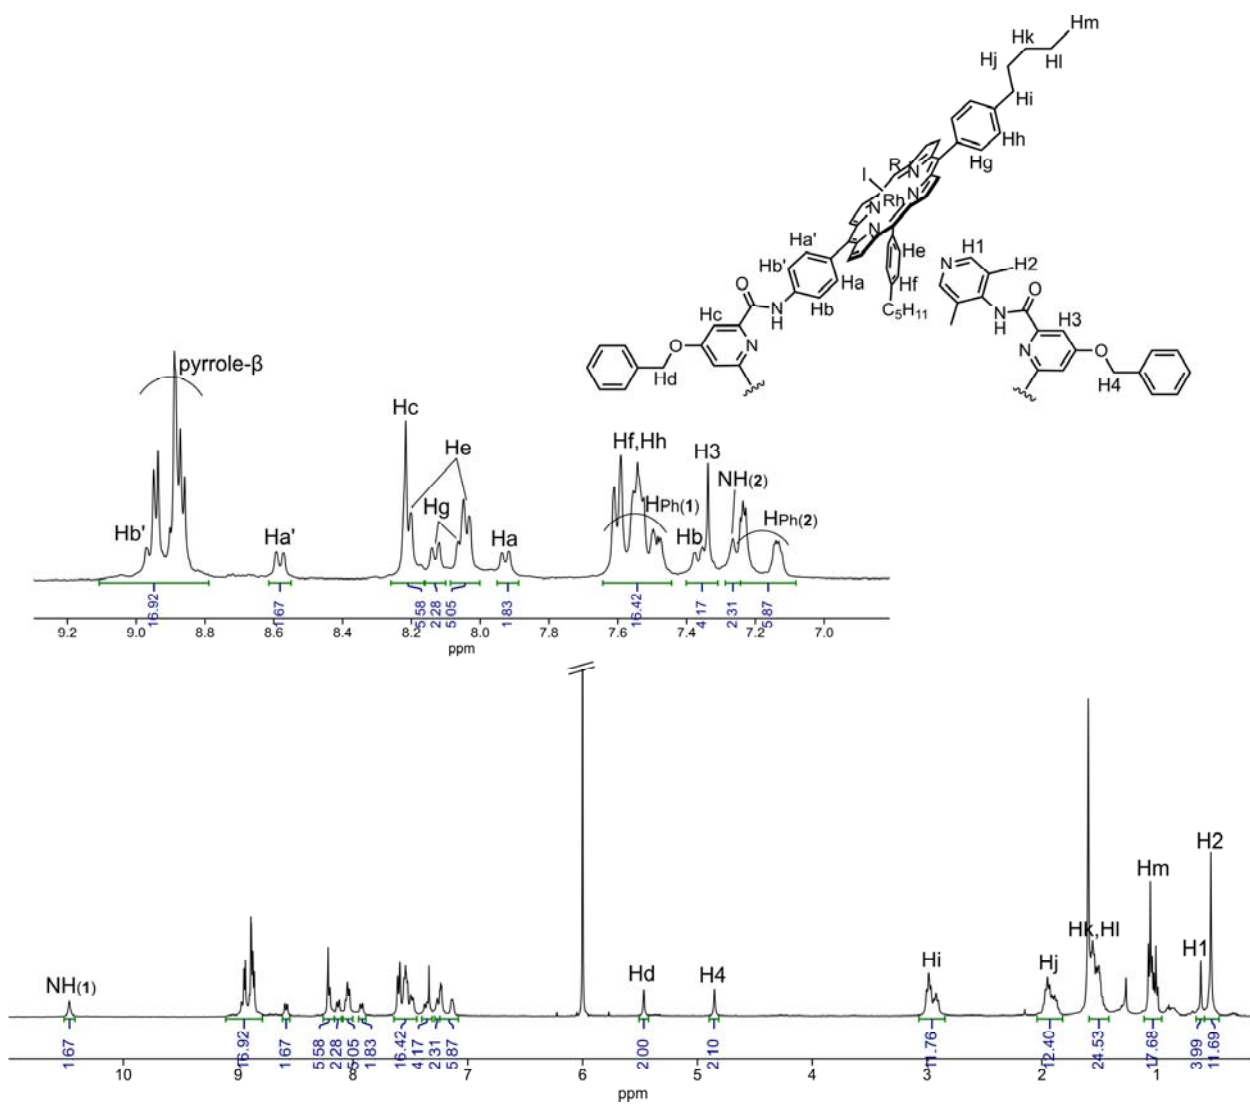

**Figure S34.** <sup>1</sup>H NMR spectrum (400 MHz, 298 K) of macrocycle **1-(RhI)<sub>2</sub>•2** in 1,1,2,2-tetrachloroethane-*d*<sub>2</sub>.

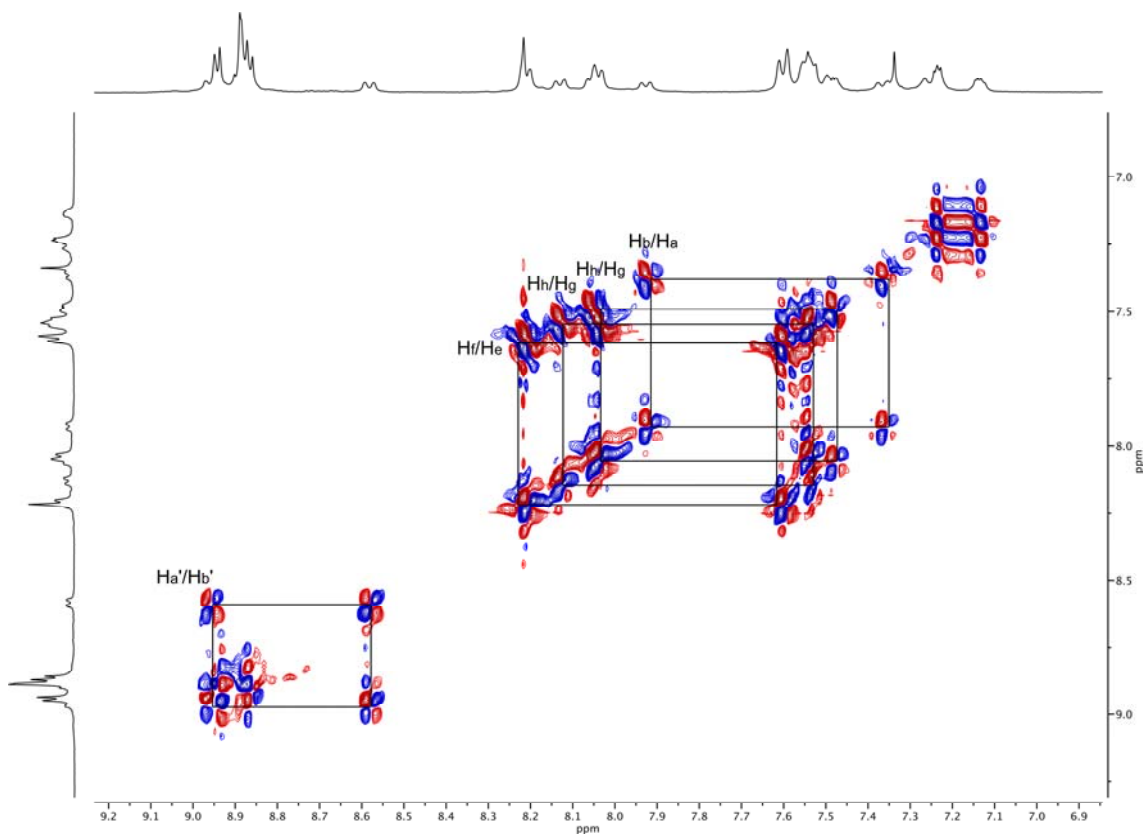

**Figure S35.** H-H COSY spectrum (400 MHz, 298 K) of macrocycle **1-(RhI)<sub>2</sub>•2** in 1,1,2,2-tetrachloroethane-*d*<sub>2</sub>.

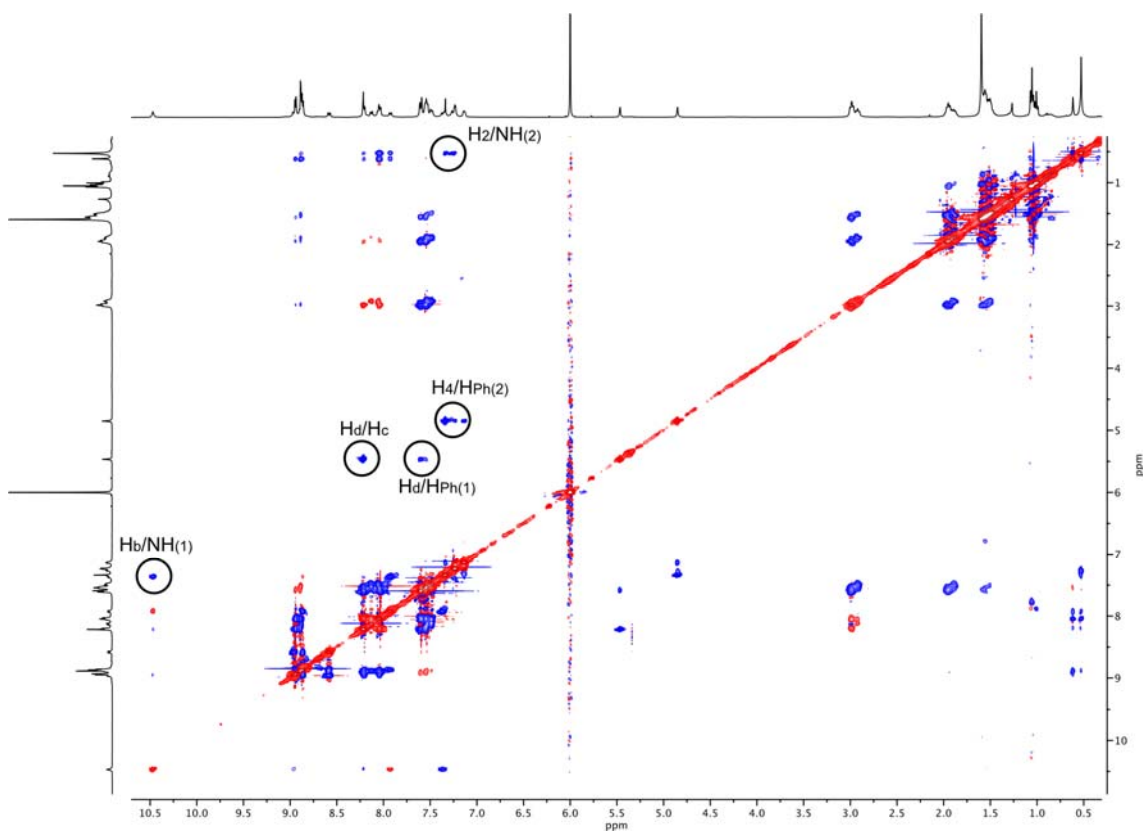

**Figure S36.** ROESY spectrum (400 MHz, 298 K) of macrocycle **1-(RhI)<sub>2</sub>•2** in 1,1,2,2-tetrachloroethane-*d*<sub>2</sub>.

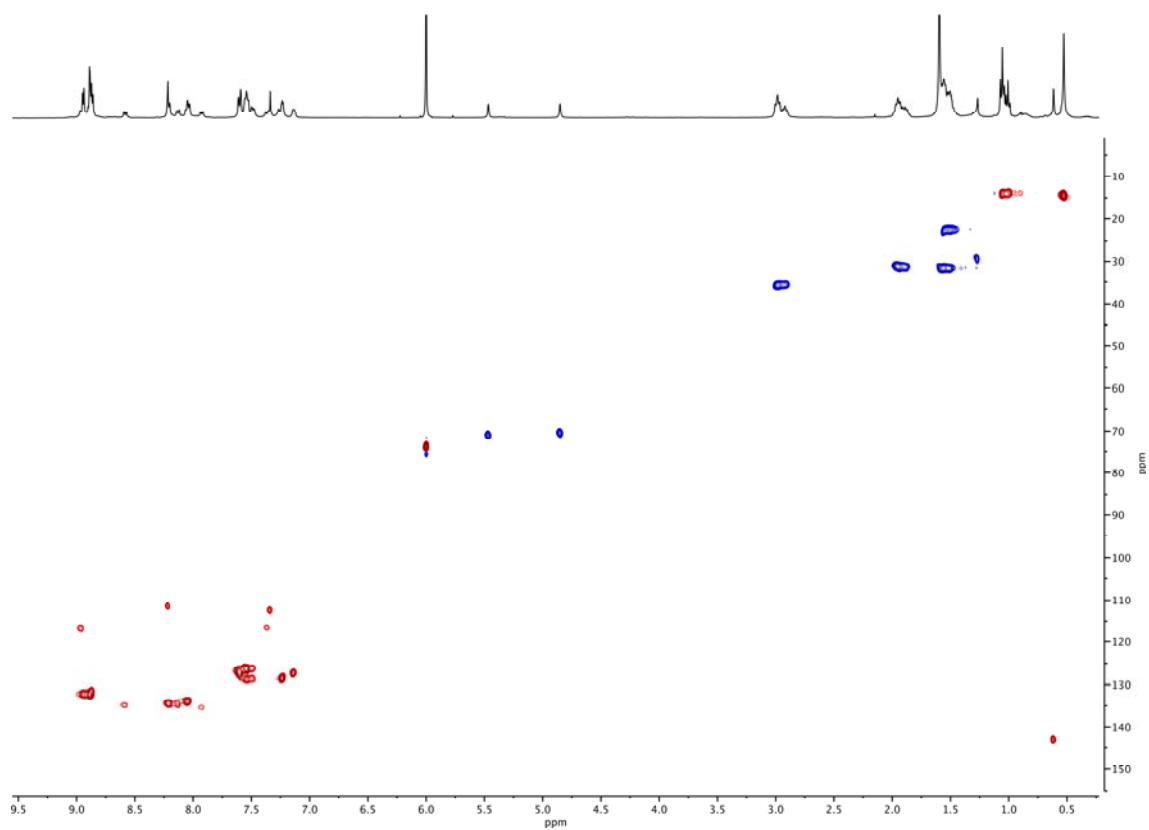

**Figure S37.** HSQC spectrum (400 MHz, 298 K) of macrocycle **1-(RhI)<sub>2</sub>•2** in 1,1,2,2-tetrachloroethane-*d*<sub>2</sub>.

## 9. References

- (1) Chang, S.-Y.; Choi, J. S.; Jeong, K.-S., Self-Assembly and Dynamics of [2]- and [3]Rotaxanes with a Dinuclear Macrocyclic Containing Reversible Os–N Coordinate Bonds. *Chem. Eur. J.* **2001**, *7*, 2687-2697.
- (2) McKenzie, B. M.; Miller, A. K.; Wojtecki, R. J.; Johnson, J. C.; Burke, K. A.; Tzeng, K. A.; Mather, P. T.; Rowan, S. J., Improved synthesis of functionalized mesogenic 2,6-bisbenzimidazolylpyridine ligands. *Tetrahedron* **2008**, *64*, 8488-8495.
- (3) Gardner, M.; J. Guerin, A.; A. Hunter, C.; Michelsen, U.; Rotger, C., Self-assembly of zinc aminoporphyrins. *New J. Chem.* **1999**, *23*, 309-316.
- (4) Essery, J. M.; Schofield, K., Some derivatives of 4-amino- and 4-nitro-pyridine. *J. Chem. Soc.* **1960**, 4953-4959.
